# Supplementary material for: Combined use of karyotyping and copy number variation sequencing technology in prenatal diagnosis
Source: PeerJ. 2022 Dec 5;10:e14400. doi: 10.7717/peerj.14400 (PMC9745786; doi:10.7717/peerj.14400)
Supplement: Supplemental Information 5 — AMA, advanced maternal age; MSSHR, maternal serum screening high-risk; AFU, abnormal fetal ultrasonography; HARO, history of adverse reproductive outcomes; mix, mixed indicators; NIPT, non-invasive prenatal testing; NT, nuchal translucency; NF, thickened nuchal fold; CNV, copy number variation; FGR, fetal growth restriction; PGD, preimplantation genetic diagnosis. [file peerj-10-14400-s005.xlsx]

## Sheet: Sheet1
Experiment No.	Maternal age(years)	Groups of amniocentesis indicators	Details of amniocentesis indicators	gestational week	Molecular Test results (ISCN 2016)	Molecular Test results (ISCN 2020)	Chromosome karyotype results
Y19157	27	AFU	Fetal congenital heart disease	21w+3	CNV Normal	CNV Normal	46,XX
Y19188	48	AMA, mix	AMA, Gestational diabetes	19w+3	CNV Normal	CNV Normal	46,XY
Y19409	44	AMA	AMA	19w+1	CNV Normal	CNV Normal	46,XX
Y19616	44	AMA	AMA	19w+2	CNV Normal	CNV Normal	46,XX
Y19663	44	AMA	AMA	18w+4	CNV Normal	CNV Normal	46,XX
Y19394	43	AMA, HARO	AMA, History of adverse reproductive	18w+2	CNV Normal	CNV Normal	46,XY
Y19505	43	AMA	AMA	19w+5	CNV Normal	CNV Normal	46,XY
Y19050	42	AMA	AMA	19w+1	CNV Normal	CNV Normal	46,XX
Y19180	42	AMA	AMA	18w+5	CNV Normal	CNV Normal	46,XY
Y19328	42	AMA, AFU	AMA, Fetal congenital heart disease	19w+1	CNV Normal	CNV Normal	46,XX
Y18653	41	AMA, mix	AMA, Vaginal bleeding during early pregnancy	18w+3	CNV Normal	CNV Normal	46,XX
Y19223	41	AMA	AMA	19w	CNV Normal	CNV Normal	46,XX
Y19247	41	AMA	AMA	18w+3	CNV Normal	CNV Normal	46,XY
Y19294	41	AMA	AMA	18w	CNV Normal	CNV Normal	46,XY
Y19320	41	AMA	AMA	18w+6	CNV Normal	CNV Normal	46,XY
Y19368	41	AMA	AMA	20w	CNV Normal	CNV Normal	46,XY
Y19617	41	AMA	AMA	26w+5	CNV Normal	CNV Normal	46,XX
Y19709	41	AMA	AMA	19w+2	CNV Normal	CNV Normal	46,XX
Y21021	33	MSSHR, AFU	Positive Down syndrome screen:Risk:T-21 1/384, Fetal ultrasound structural abnormality	18w+5	CNV Normal	CNV Normal	46,XX
Y18438	40	AMA, HARO	AMA, History of adverse reproductive	20w+4	CNV Normal	CNV Normal	46,XX
Y19119	40	AMA, HARO	AMA, History of adverse reproductive	18w+6	CNV Normal	CNV Normal	46,XY
Y19197	40	AMA	AMA	18w+6	CNV Normal	CNV Normal	46,XX
Y19315	40	AMA	AMA	18w	CNV Normal	CNV Normal	46,XX
Y19333	40	AMA	AMA	18w+1	CNV Normal	CNV Normal	46,XX
Y19352	40	AMA, HARO	AMA, History of adverse reproductive	19w+1	CNV Normal	CNV Normal	46,XY
Y19398	40	AMA	AMA	20w+2	CNV Normal	CNV Normal	46,XX
Y19444	40	AMA, MSSHR	AMA, Positive Down syndrome screen:Risk:T-18 1/345	19w+2	CNV Normal	CNV Normal	46,XX
Y19484	40	AMA	AMA	19w+4	seq[hg19]dup(X)(p22.31) chrX:g.6440001_8140000dup	seq[GRCh38]dup(X)(p22.31) NC_000023.11:g.6521960_8171959dup	46,XX
Y19618	40	AMA	AMA	18w+1	CNV Normal	CNV Normal	46,XY
Y18221	39	AMA	AMA	18w	CNV Normal	CNV Normal	46,XX
Y18235	39	AMA	AMA	18w+3	CNV Normal	CNV Normal	46,XX
Y18465	39	AMA	AMA	19w+1	CNV Normal	CNV Normal	46,XX
Y18600	39	AMA	AMA	18w+1	CNV Normal	CNV Normal	46,XX
Y19270	39	AMA	AMA	18w+6	CNV Normal	CNV Normal	46,XY
Y19374	39	AMA	AMA	18w+6	CNV Normal	CNV Normal	46,XY
Y19380	39	AMA	AMA	19w+1	CNV Normal	CNV Normal	46,XY
Y19411	39	AMA	AMA	18w+5	CNV Normal	CNV Normal	46,XY
Y19475	39	AMA	AMA	18w+5	CNV Normal	CNV Normal	46,XY
Y19537	39	AMA	AMA	19w+4	CNV Normal	CNV Normal	46,XY
Y19546	39	AMA, AFU	AMA, NF：6.5mm	24w	CNV Normal	CNV Normal	46,XY
Y19763	39	AMA	AMA	19w+4	CNV Normal	CNV Normal	46,XX
Y18067	38	AMA, mix	AMA, Balanced translocation carriers	17w+5	CNV Normal	CNV Normal	46,XY
Y18276	38	AMA, HARO	AMA, History of adverse reproductive	20w+2	CNV Normal	CNV Normal	46,XX
Y19030	38	AMA, mix	AMA, Gestational diabetes	18w+5	CNV Normal	CNV Normal	46,XX
Y19500	38	AMA	AMA	18w+3	CNV Normal	CNV Normal	46,XX
Y19688	38	AFU, AMA	AMA, NT:4.3mm	19w+4	seq[hg19]dup(21)(q11.2q22.3) chr21:g.14300000_48129895dup	seq[GRCh38]dup(21)(q11.2q22.3) NC_000020.11:g.12965809_46699983dup	47,XX,+21
Y19691	38	AMA	AMA	19w+3	CNV Normal	CNV Normal	46,XX
Y18270	37	AMA	AMA	18w+2	CNV Normal	CNV Normal	46,XX
Y18469	37	AMA, HARO	AMA, History of adverse reproductive	20w	CNV Normal	CNV Normal	46,XX
Y18477	37	AMA	AMA	19w+4	CNV Normal	CNV Normal	46,XX,t(8;9)(p22;q22)
Y18483	37	AMA	AMA	21w+2	CNV Normal	CNV Normal	46,XY
Y19237	37	AMA	AMA	22w+1	CNV Normal	CNV Normal	46,XX
Y19244	37	AMA	AMA	19w+1	CNV Normal	CNV Normal	46,XY
Y19300	37	AMA	AMA	18w+6	CNV Normal	CNV Normal	46,XY
Y19306	37	AMA	AMA	18w+2	CNV Normal	CNV Normal	46,XX
Y19366	37	AMA, mix	AMA, Gestational diabetes, Hypertension during pregnancy	22w+4	CNV Normal	CNV Normal	46,XX
Y19418	37	AMA, MSSHR	AMA, Positive Down syndrome screen:Risk:T-21 1/42	18w+1	CNV Normal	CNV Normal	46,XY
Y19476	37	AMA	AMA	18w+1	CNV Normal	CNV Normal	46,XX
Y19559	37	AMA, HARO	AMA, History of adverse reproductive	19w+1	CNV Normal	CNV Normal	46,XX
Y19633	37	AMA, mix	AMA, Take medication in early pregnancy	19w	CNV Normal	CNV Normal	46,XY
Y19646	37	AMA	AMA	18w+6	CNV Normal	CNV Normal	46,XY
Y18058	36	AMA, AFU	AMA, Fetal ultrasound structural abnormality	24w+4	CNV Normal	CNV Normal	46,XX
Y18254	36	AMA, HARO	AMA, History of adverse reproductive	19w+3	CNV Normal	CNV Normal	46,XY
Y18365	36	AMA, HARO	AMA, History of adverse reproductive	18w+1	CNV Normal	CNV Normal	46,XX
Y19037	36	AMA	AMA	18w+6	CNV Normal	CNV Normal	46,XX
Y19065	36	AMA, HARO	AMA, History of adverse reproductive	19w+1	CNV Normal	CNV Normal	46,XY
Y19105	36	AMA, mix	AMA, Husband was the balanced translocation carriers:46,XY,Yqh,t(15;19)(q26.1;13.1)	20w+4	CNV Normal	CNV Normal	46,XY
Y19171	36	AMA	AMA	24w	CNV Normal	CNV Normal	46,XY
Y19181	36	AMA	AMA	20w+4	CNV Normal	CNV Normal	46,XX
Y19253	36	AMA, HARO	AMA, History of adverse reproductive	18w+4	CNV Normal	CNV Normal	46,XX
Y19289	36	AMA	AMA	29w+2	CNV Normal	CNV Normal	46,XX
Y19296	36	AMA	AMA	19w+4	CNV Normal	CNV Normal	46,XY
Y19323	36	AMA	AMA	20w+1	CNV Normal	CNV Normal	46,XX
Y19541	36	AMA	AMA	18w+1	seq[hg19]dup(X)(p22.31) chrX:g.6455151_8135568dup	seq[GRCh38]dup(X)(p22.31) NC_000023.11:g.6537110_8167527dup	46,XX
Y19608	36	AMA, AFU	AMA, NT:2.8mm	18w+5	CNV Normal	CNV Normal	46,XX
Y19747	36	AMA	AMA	18w+2	CNV Normal	CNV Normal	46,XY
Y18338	35	AMA, AFU	AMA, Fetal ultrasound structural abnormality	18w	CNV Normal	CNV Normal	46,XX
Y18350	35	AMA, mix	AMA, Treatment of "Tripterygium wilfordii" in early pregnancy	20w	CNV Normal	CNV Normal	46,XY
Y18450	35	AMA	AMA	19w	CNV Normal	CNV Normal	46,XY
Y19182	35	AMA	AMA	22w+3	CNV Normal	CNV Normal	46,XX
Y19341	35	AMA	AMA	18w+6	CNV Normal	CNV Normal	46,XY
Y19382	35	AMA	AMA	19w+2	CNV Normal	CNV Normal	46,XY
Y19399	35	AMA	AMA	19w+5	seq[hg19]dup(21)(q21.1q21.3)(mos) chr21:g.20220000_27060000dup	seq[GRCh38]dup(21)(q21.1q21.3)(mos)NC_000021.9:g.18847682_25687688dup	46,XX
Y19440	35	AMA	AMA	19w	CNV Normal	CNV Normal	46,XX,inv(8)?(p23.1q13)
Y19454	35	AMA, MSSHR	AMA, Positive Down syndrome screen:T-21 1/252	20w+3	seq[hg19]dup(X)(p22.31) chrX:g.6440001_8160000dup	seq[GRCh38]dup(X)(p22.31) NC_000023.11:g.6521960_8191959dup	46,XX
Y19477	35	AMA, AFU	AMA, NT：3.8mm	19w+4	seq[hg19]dup(21)(q11.2q22.3) chr21:g.14300000_48129895dup	seq[GRCh38]dup(21)(q11.2q22.3) NC_000020.11:g.12965809_46699983dup	47,XY,+21
Y19517	35	AMA	AMA	20w	CNV Normal	CNV Normal	46,XY
Y19547	35	AMA	AMA	18w+4	CNV Normal	CNV Normal	46,XX
Y17321	35	AMA, AFU	AMA, Fetal ultrasound structural abnormality	18w+4	CNV Normal	CNV Normal	46,XY
Y18328	35	AMA, AFU	AMA, Positive for ultrasonographic soft markers	23w+1	CNV Normal	CNV Normal	46,XX
Y18551	34	MSSHR, HARO	Positive Down syndrome screen:Risk:T-21 1/320, History of adverse reproductive	19w	CNV Normal	CNV Normal	46,XY
Y19318	34	MSSHR	Positive Down syndrome screen:Risk:T-21 1/161	19w+4	CNV Normal	CNV Normal	46,XX
Y19322	34	HARO	History of adverse reproductive	20w	CNV Normal	CNV Normal	46,XY
Y19455(C19001)	35	AMA, AFU	AMA, FGR, single umbilical artery	25w+1	CNV Normal	CNV Normal	46,XY
Y18468	33	HARO	History of adverse reproductive	18w+4	CNV Normal	CNV Normal	46,XY
Y18531	33	mix	Gestational diabetes, Oral therapy with metformin	24w+6	CNV Normal	CNV Normal	46,XY
Y19135	33	AFU	Absence of nasal bone	23w+1	CNV Normal	CNV Normal	46,XY
Y19238	33	AFU	Absence of nasal bone	19w+5	CNV Normal	CNV Normal	46,XY
Y19339	33	NIPT	High-risk NIPT results for chromosome 21	22w+6	CNV Normal	CNV Normal	46,XX
Y19367	33	AFU	Fetal lateral ventricle enlargement	26w+3	CNV Normal	CNV Normal	46,XX
Y19371	33	HARO	History of adverse reproductive	18w+3	CNV Normal	CNV Normal	46,XY
Y19396	33	HARO	History of adverse reproductive	19w+1	CNV Normal	CNV Normal	46,XY
Y19450	33	MSSHR	Positive Down syndrome screen:Risk:T-21 1/187	18w	CNV Normal	CNV Normal	46,XY
Y19602	33	HARO	History of adverse reproductive	19w+5	CNV Normal	CNV Normal	46,XX
Y19653	33	HARO	History of adverse reproductive	22w	CNV Normal	CNV Normal	46,XY
Y19740	33	NIPT	High-risk NIPT results for chromosome 8	20w+4	seq[hg19]dup(8)(q22.1q24.3) chr8:g.97822128_146295771dup seq[hg19]del(12)(q24.33) chr(12):g.132659202_133777562del	seq[GRCh38]dup(8)(q22.1q24.3) NC_000008.11:g.96809900_145070385dup seq[GRCh38]del(12)(q24.33)NC_000012.12:g.132174657_133200976del	46,XY,der(12)t(8;12)(q22;q24.1)
Y18346	32	MSSHR	Positive Down syndrome screen:Risk:T-21 1/201	19w+3	CNV Normal	CNV Normal	46,XY
Y18439	32	MSSHR	Positive Down syndrome screen:Risk:T-21 1/164	19w+6	CNV Normal	CNV Normal	46,XX
Y19063	32	HARO	History of adverse reproductive	18w+2	CNV Normal	CNV Normal	46,XY
Y19243	32	NIPT	High-risk NIPT results for chromosome 21	22w+4	CNV Normal	CNV Normal	46,XX
Y19286	32	AFU	Fetal ultrasound structural abnormality	24w+3	CNV Normal	CNV Normal	46,XX
Y19357	32	mix	Pregnancy with gestational diabetes, missed screening time	26w+4	seq[hg19]dup(X)(p22.31) chrX:g.6440001_8140000dup	seq[GRCh38]dup(X)(p22.31) NC_000023.11:g.6521960_8171959dup	46,XY
Y19372	32	HARO	History of adverse reproductive	19w+6	CNV Normal	CNV Normal	46,XY
Y19494	32	MSSHR, HARO	Positive Down syndrome screen:Risk:T-21 1/256, History of adverse reproductive	18w+4	seq[hg19]dup(15)(q13.2q13.3) chr15:g.30386398_32931921dup	seq[GRCh38]dup(15)(q13.2q13.3) NC_000015.10:g.30094195_32639720dup	46,XX
Y19495	32	AFU	Fetal ultrasound structural abnormality	24w+6	CNV Normal	CNV Normal	46,XX
Y19503	32	HARO	History of adverse reproductive	19w	CNV Normal	CNV Normal	46,XY
Y19519	32	AFU	Absence of nasal bone	18w+5	CNV Normal	CNV Normal	46,XX
Y19531	32	NIPT	High-risk NIPT results for chromosome 18	28w+1	CNV Normal	CNV Normal	46,XX
Y19584	32	AFU	NT：4.0mm	18w+2	CNV Normal	CNV Normal	46,XY
Y19619	32	MSSHR	Positive Down syndrome screen:Risk:T21 1/10	18w+2	CNV Normal	CNV Normal	46,XX
Y19764	32	HARO	History of adverse reproductive	19w	CNV Normal	CNV Normal	46,XX
Y17341	31	AFU	Absence of nasal bone	26w+1	seq[hg19]del(X)(q27.3) chrX:g.143320000-143580000del	seq[GRCh38]del(X)(q27.3) NC_000023.11:g.144236894_144498449del	46,XX
Y18095A	31	AFU	Intra-abdominal cystic mass	19w+6	seq[hg19]dup(10)(q23.1) chr10:g.85280000_8620000dup	seq[GRCh38]dup(10)(q23.1) NC_000010.11:g.83520244_84440244 dup	46,XX
Y18106	31	mix	History of exposure to adverse factors during early pregnancy, pregnancy complicated by hyperthyroidism.	20w+1	CNV Normal	CNV Normal	46,XY
Y18191	31	HARO	History of adverse reproductive	19w	CNV Normal	CNV Normal	46,XY
Y18421	31	MSSHR	Positive Down syndrome screen:Risk:T-21 1/47	19w+4	CNV Normal	CNV Normal	46,XX
Y18425	31	MSSHR	Positive Down syndrome screen:Risk:T-21 1/266, Positive Down syndrome screen:Risk:T-18 1/10	19w+2	CNV Normal	CNV Normal	46,XX
Y19097	31	mix, HARO	paracentric inversion of chromosome 4 in pregnant woman, Stillbirth at 18 weeks gestation.	18w+4	CNV Normal	CNV Normal	46,XX
Y19156	31	mix	Gestational diabetes, Early oral hypoglycemic drugs, poor blood glucose control	18w+5	CNV Normal	CNV Normal	46,XX
Y19271	31	MSSHR	Positive Down syndrome screen:Risk:T-21 1/252	18w+2	seq[hg19]dup(3)(p14.1) chr3:g.68040000_69080000dup	seq[GRCh38]dup(3)(p14.1) NC_000003.12:g.67990858_69030849dup	46,XX
Y19292	31	MSSHR	Positive Down syndrome screen:Risk:T-21 1/270	19w+5	CNV Normal	CNV Normal	46,XX
Y19362	31	AFU	NF:8mm	23w+5	CNV Normal	CNV Normal	46,XY
Y19446	31	MSSHR	Positive Down syndrome screen:Risk:T-21 1/56	18w+3	CNV Normal	CNV Normal	46,XX
Y19627	31	HARO	History of adverse reproductive	20w+1	CNV Normal	CNV Normal	46,XY,t(1;13)(q42;q32),t(6;10)(q25;q24)[15]/46, XY,t(6;10)(q25;q24)[50]
Y19675	31	MSSHR	Positive Down syndrome screen:Risk:T21 1/265	19w+2	CNV Normal	CNV Normal	46,XX
Y18176	30	AFU	Positive for ultrasonographic soft markers	25w+2	CNV Normal	CNV Normal	46,XX
Y18218	30	AFU	Positive for ultrasonographic soft markers	19w+5	CNV Normal	CNV Normal	46,XX
Y18223	30	AFU, MSSHR	NT:4.6mm, Positive Down syndrome screen:Risk:T-21 1/64, Positive Down syndrome screen:Risk:T-18 1/342	18w+6	CNV Normal	CNV Normal	46,XY
Y18238	30	AFU	Fetal congenital heart disease	17w+2	CNV Normal	CNV Normal	46,XY
CNV2	30	AFU	Fetal lateral ventricle enlargement	31w+3	CNV Normal	CNV Normal	46,XX
Y18325	30	mix	Gestational diabetes and hypothyroidism	18w+2	CNV Normal	CNV Normal	46,XY
Y18401	30	NIPT	High-risk NIPT results for chromosome 18	20w+2	seq[hg19]dup(18)(p11.32q23) chr18:g.1_78077248dup	seq[GRCh38]dup(18)(p11.32q23) NC_000018.10:g.10001_80259271dup	47,XX,+18
Y18410	30	HARO	History of adverse reproductive	24w+4	CNV Normal	CNV Normal	46,XY
Y19115	30	MSSHR	Positive Down syndrome screen:Risk:T-18 1/325	21w+3	CNV Normal	CNV Normal	46,XY
Y19282	30	HARO	History of adverse reproductive	22w+5	CNV Normal	CNV Normal	46,XX
Y19334	30	MSSHR	Positive Down syndrome screen:Risk:T-21 1/256	18w+1	CNV Normal	CNV Normal	46,XX
Y19356	30	AFU	Fetal ultrasound structural abnormality	26w+5	CNV Normal	CNV Normal	46,XY
Y19387	30	AFU	Positive for ultrasonographic soft markers	26w	CNV Normal	CNV Normal	46,XX
Y19388	30	HARO	Down syndrome of previous fetus	18w+5	CNV Normal	CNV Normal	46,XX
Y19491	30	NIPT	High-risk NIPT results for chromosome 21	19w+4	seq[hg19]dup(21)(q11.2q22.3) chr21:g.14300000_48129895dup	seq[GRCh38]dup(21)(q11.2q22.3) NC_000021.9:g.12965809_46699983dup	47,XY,+21
Y19556	30	HARO	History of adverse reproductive	18w+3	CNV Normal	CNV Normal	46,XX
Y19567	30	AFU	Fetal congenital heart disease	26w+5	CNV Normal	CNV Normal	46,XX
Y19672	30	HARO	History of adverse reproductive	19w+2	CNV Normal	CNV Normal	46,XX
Y18260	29	HARO	History of adverse reproductive	19w+1	CNV Normal	CNV Normal	46,XY
Y18308	29	AFU	Fetal ultrasound structural abnormality	24w	CNV Normal	CNV Normal	46,XX
Y18627	29	HARO	History of adverse reproductive	17w+6	CNV Normal	CNV Normal	46,XX
Y18655	29	AFU	Positive for ultrasonographic soft markers, Medullary cavity was widened and Bowel echo enhancement	26w+4	CNV Normal	CNV Normal	46,XY
Y19012	29	HARO	History of adverse reproductive	20w+5	CNV Normal	CNV Normal	46,XX
Y19154	29	HARO	History of adverse reproductive	19w+5	CNV Normal	CNV Normal	46,XY
Y19278	29	AFU	Positive for ultrasonographic soft markers	23w+6	CNV Normal	CNV Normal	46,XX
Y19360	29	AFU	Positive for ultrasonographic soft markers	19w+4	CNV Normal	CNV Normal	46,XY
Y19404	29	AFU	NF: 5mm	19w+5	CNV Normal	CNV Normal	46,XY
Y19464	29	mix	Pregnant women with intellectual disability	22w+1	CNV Normal	CNV Normal	46,XX
Y19553	29	MSSHR	Positive Down syndrome screen:Risk:T-21 1/83	18w+3	CNV Normal	CNV Normal	46,XX
Y19568	29	HARO	History of adverse reproductive	19w+4	CNV Normal	CNV Normal	46,XX
Y19657	29	AFU	NT:3.4mm	18w+4	CNV Normal	CNV Normal	46,XY
Y19696	29	HARO	FGR of the first-born	18w+4	seq[hg19]del(6)(q12) chr6:g.65980001_67180000del	seq[GRCh38]del(6)(q12) NC_000006.12:g.65270108_66470107del	46,XY
Y19712	29	AFU	NT:4.0mm	19w+2	CNV Normal	CNV Normal	46,XX
Y19714	29	AFU	NT:6.0mm, Fetal lateral ventricle enlargement, Pleural effusion	17w+3	CNV Normal	CNV Normal	46,XY
Y19746	29	HARO	History of adverse reproductive	19w+4	CNV Normal	CNV Normal	46,XY
Y18051	28	AFU	Fetal head facial skin hydrops	23w+4	seq[hg19]dup(6)(q16.3) chr6:g.103260000_103680000dup	seq[GRCh38]dup(6)(q16.3) NC_000006.12:g.102812125_103232125dup	46,XY
Y18198	28	mix, NIPT	Wife was the balanced translocation carriers: 46,XX,t(1;10)(q42;q26), High-risk NIPT results for other chromosome	22w+2	CNV Normal	CNV Normal	46,XY,t(1;10)(q42;q26)
Y18207	28	AFU	Fetal ultrasound structural abnormality	24w+4	seq[hg19]dup(21)(q11.2q22.3) chr21:g.14300000_48129895dup	seq[GRCh38]dup(21)(q11.2q22.3) NC_000021.9:g.12965809_46699983dup	47,XY,+21
Y18268	28	AFU	single umbilical artery	24w+5	CNV Normal	CNV Normal	46,XX
Y18320	28	AFU	Absence of nasal bone	24w+1	CNV Normal	CNV Normal	46,XY
Y18359	28	AFU	NT:2.5mm	19w+1	CNV Normal	CNV Normal	46,XY
Y18383	28	AFU	Positive for ultrasonographic soft markers	24w	CNV Normal	CNV Normal	46,XX
Y18386	28	AFU	Fetal ultrasound structural abnormality	25w+1	CNV Normal	CNV Normal	46,XX
Y18451	28	HARO	History of adverse reproductive	19w+1	CNV Normal	CNV Normal	46,XX
Y18540	28	mix	Family history of developmental abnormalities.	18w+2	CNV Normal	CNV Normal	46,XX
CNV5	28	AFU	Fetal ultrasound structural abnormality	30w+2	CNV Normal	CNV Normal	46,XY
Y18609	28	MSSHR, HARO	Positive Down syndrome screen:Risk:T-21 1/241, Previously induced fetuses due to multiple malformations.	18w+5	CNV Normal	CNV Normal	46,XX
Y18696	28	AFU	Fetal lateral ventricle enlargement	28w+5	CNV Normal	CNV Normal	46,XY
Y19108	28	HARO	History of adverse reproductive	18w+3	CNV Normal	CNV Normal	46,XY
Y19184	28	AFU	Fetal congenital heart disease	24w	CNV Normal	CNV Normal	46,XX
Y19194	28	AFU	NT:3.8mm	18w+4	seq[hg19]dup(21)(q21.1q22.3) chr21:g.20420001_48100000dup	seq[GRCh38]dup(21)(q21.1q22.3) NC_000021.9:g.19047682_46680088dup	45,XX,rob(14;21)(q10;q10)
Y19218	28	MSSHR	Positive Down syndrome screen:Risk:T-21 1/78	19w+1	CNV Normal	CNV Normal	46,XY
Y19234	28	HARO	History of adverse reproductive	20w	CNV Normal	CNV Normal	46,XX
Y19287	28	MSSHR	Positive Down syndrome screen:Risk:T-21 1/179	19w+3	CNV Normal	CNV Normal	46,XX
Y19358	28	MSSHR, AFU	Positive Down syndrome screen:Risk:T-21 1/189 , Positive for ultrasonographic soft markers	19w+2	CNV Normal	CNV Normal	46,XY
Y19359	28	MSSHR	Positive Down syndrome screen:Risk:T-21 1/223	18w+4	CNV Normal	CNV Normal	46,XY
Y19391	28	AFU	NT：3.9-4.1mm	18w+1	CNV Normal	CNV Normal	46,XY
Y19438	28	MSSHR	Positive Down syndrome screen:Risk:T-21 1/173	19w	CNV Normal	CNV Normal	46,XY
C19002	28	AFU	Absence of nasal bone	29w	CNV Normal	CNV Normal	46,XY
Y19516	28	HARO	Induction of labor due to congenital heart disease of previous fetus	20w+5	seq[hg19]del(22)(q11.21) chr22:g.20716876_21800471)del	seq[GRCh38]del(22)(q11.21) NC_000022.11:g.20362586_214461821del	46,XX
Y19569	28	AFU	Fetal lateral ventricle enlargement	24w+5	seq[hg19]del(16)(p13.3) chr16:g.85880_197064del	seq[GRCh38]del(16)(p13.3) NC_000016.10:g.35880_147065del	46,XX
Y19598	28	AFU	NT:3.1mm	18w+4	CNV Normal	CNV Normal	46,XY
Y19615	28	AFU	Fetal ultrasound structural abnormality	26w+6	CNV Normal	CNV Normal	46,XX
Y17257	27	MSSHR	Positive Down syndrome screen:Risk:T-21 1/132	20w+2	CNV Normal	CNV Normal	46,XY
Y18090	27	AFU	Fetal ultrasound structural abnormality	24w+1	CNV Normal	CNV Normal	46,XX
Y18202	27	MSSHR	Positive Down syndrome screen:Risk:T-21 1/266	18w+2	CNV Normal	CNV Normal	46,XY
Y18258	27	mix	Exposure to short acting contraceptives during periovulation	18w+2	CNV Normal	CNV Normal	46,XX
Y18271	27	AFU	Fetal ultrasound structural abnormality	25w+5	CNV Normal	CNV Normal	46,XY
Y18446	27	mix	Missed screening time	21w+6	CNV Normal	CNV Normal	46,XX
Y18507	27	AFU	Fetal congenital heart disease	25w+4	CNV Normal	CNV Normal	46,XY
Y18515	27	HARO	History of adverse reproductive	19w+2	CNV Normal	CNV Normal	46,XY
Y18520	27	HARO	History of adverse reproductive	20w+1	CNV Normal	CNV Normal	46,XY
Y19081	27	AFU	NT:3.4mm	19w+3	CNV Normal	CNV Normal	46,XY
Y19239	27	AFU, MSSHR	NT:4.6mm, Positive Down syndrome screen:Risk:T-21 1/35	18w+2	seq[hg19]dup(21)(q11.2q22.3) chr21:g.14300000_48129895dup	seq[GRCh38]dup(21)(q11.2q22.3) NC_000021.9:g.12965809_46699983dup	47,XX,+21
Y19290	27	MSSHR	Positive Down syndrome screen:Risk:T-21 1/203	19w+1	CNV Normal	CNV Normal	46,XX
Y19295	27	AFU, mix	Fetal congenital heart disease, Husband was the carrier of translocated chromosome::46,XY,t(4;16)(q35;q22q24)	24w+3	seq[hg19]dup(16)(q21q24.3) chr16:g.62980001_90160000dupseq[hg19]del(4)(q35.1q35.2) chr4:g.183920001_190440000del	seq[GRCh38]dup(16)(q21q24.3) NC_000016.10:g.62946097_90093592dupseq[GRCh38]del(4)(q35.1q35.2)NC_000004.12:g.182998848_189518846del	46,XX,der(4) t(4;16)(q35;q21q24)
Y19301	27	MSSHR	Positive Down syndrome screen:Risk:T-21 1/253	19w+6	CNV Normal	CNV Normal	46,XX
Y19305	27	HARO	History of adverse reproductive	20w+2	CNV Normal	CNV Normal	46,XY
Y19329	27	MSSHR	Positive Down syndrome screen:Risk:T-21 1/93	19w+1	CNV Normal	CNV Normal	46,XY
Y19342	27	HARO	History of adverse reproductive	18w	CNV Normal	CNV Normal	46,XY
Y19406	27	HARO	History of adverse reproductive	20w+4	CNV Normal	CNV Normal	46,XX
Y19421	27	AFU	Fetal congenital heart disease	24w+3	CNV Normal	CNV Normal	46,XX
Y19437	27	MSSHR	Positive Down syndrome screen:Risk:T-21 1/210	23w+1	CNV Normal	CNV Normal	46,XY
Y19582	27	AFU	Fetal ultrasound structural abnormality	25w+2	CNV Normal	CNV Normal	46,XY
Y19605	27	MSSHR	Positive Down syndrome screen:Risk:T21 1/68	18w+6	seq[hg19]del(8)(p23.3p23.1) chr8:g.160001_6940000del	seq[GRCh38]del(8)(p23.3p23.1) NC_000008.11:g.210001_7082478del	46,XX
Y19620	27	AFU	Fetal ultrasound structural abnormality	20w+2	CNV Normal	CNV Normal	46,XY
Y19652	27	MSSHR	Positive Down syndrome screen:Risk:T21 1/90	18w+2	seq[hg19]dup(Y)(p11.32q12) chrY:g.1_59373566dup	seq[GRCh38]dup(Y)(p11.32q12) NC_000024.10:g.1_57217415dup	47,XY,+?mar
Y19655	27	AFU, MSSHR	NT:2.3mm, Positive Down syndrome screen:Risk:T21 1/219	19w+4	CNV Normal	CNV Normal	46,XX
Y19689	27	MSSHR, HARO	Positive Down syndrome screen:Risk:T21 1/193, History of adverse reproductive	19w+4	seq[hg19]dup(21)(q11.2q22.3) chr21:g.14300000_48129895dup	seq[GRCh38]dup(21)(q11.2q22.3) NC_000021.9:g.12965809_46699983dup	47,XX,+21
Y19698	27	MSSHR	Positive Down syndrome screen:Risk:T21 1/188	18w+4	CNV Normal		46,XY
Y19737	27	NIPT	High-risk NIPT results for chromosome 9	19w	CNV Normal		46,XX
Y19753	27	HARO	History of adverse reproductive	19w+3	CNV Normal		46,XX
Y19754	27	HARO	History of adverse reproductive	19w+1	CNV Normal		46,XY
Y17209	26	HARO	History of adverse reproductive	21w+3	CNV Normal		46,XY
Y18257	26	HARO	History of adverse reproductive	19w	seq[hg19]dup(X)(p22.31)chrX:g.6500001_8100000dup	seq[GRCh38]dup(X)(p22.31)NC_000023.11:g.6581960_8131959dup	46,XY
Y18309	26	AFU	Fetal ultrasound structural abnormality	19w+3	CNV Normal	CNV Normal	46,XY
Y18356	26	AFU	Fetal congenital heart disease	25w+1	seq[hg19]del(22)(q11.21) chr22:g.18880000_21820000del	seq[GRCh38]del(22)(q11.21) NC_000022.11:g.18892487_21465711del	46,XY
Y18380	26	HARO	History of adverse reproductive	21w	CNV Normal	CNV Normal	46,XX
Y18423A	26	AFU	Positive for ultrasonographic soft markers	23w+4	CNV Normal	CNV Normal	46,XY
Y18423B	26	AFU	Positive for ultrasonographic soft markers	23w+4	CNV Normal	CNV Normal	46,XY
Y18428	26	MSSHR, NIPT	Positive Down syndrome screen:Risk:T-21 1/30, High-risk NIPT results for chromosome 13	21w+5	CNV Normal	CNV Normal	46,XX
Y18443	26	MSSHR	Positive Down syndrome screen:Risk:T-21 1/34	19w+2	seq[hg19]dup(16)(p13.11) chr16:g.15120000_16740000dup	seq[GRCh38]dup(16)(p13.11) NC_000016.10:g.15026143_16646143dup	46,XX
Y18491	26	MSSHR, AFU	Positive Down syndrome screen:Risk:T-21 1/175, Bilateral choroid plexus cyst of fetus	25w+5	CNV Normal	CNV Normal	46,XY
Y18503	26	AFU	Fetal congenital heart disease	25w+6	CNV Normal	CNV Normal	46,XY
Y18533	26	AFU	Fetal ultrasound structural abnormality	17w+3	CNV Normal	CNV Normal	46,XX
Y18661	26	HARO	History of adverse reproductive	19w+2	CNV Normal	CNV Normal	46,XX
Y18697	26	AFU	Absence of nasal bone	23w+5	CNV Normal	CNV Normal	46,XY
Y18718	26	mix	Chromosomal abnormalities of pregnant woman	18w	seq[hg19]del(1)(p36.33p36.32) chr1:g.820001_2740000del	seq[GRCh38]del(1)(p36.33p36.32) NC_000001.11:g.884621_2823435del	46,XX
Y19029	26	AFU, MSSHR	Bowel echo enhancement, Positive Down syndrome screen:Risk: T-21 1/154	26w+5	CNV Normal	CNV Normal	45,XY,rob(13;14)(q10;q10)
Y19113	26	AFU	Fetal congenital heart disease	26w+5	CNV Normal	CNV Normal	46,XX
Y19255	26	MSSHR, AFU	Positive Down syndrome screen:Risk:T-21 1/263, Fetal ultrasound showed slightly smaller right heart and pleural effusion	23w+5	CNV Normal	CNV Normal	46,XY
Y19262	26	MSSHR	Positive Down syndrome screen:Risk:T-21 1/160	19w+4	CNV Normal	CNV Normal	46,XX
Y19299	26	MSSHR	Positive Down syndrome screen:Risk:T-21 1/270	18w+3	CNV Normal	CNV Normal	46,XY
Y19350	26	MSSHR	Positive Down syndrome screen:Risk:T-21 1/158	18w	seq[hg19]del(17)(p12) chr17:g.14100001_15420000del	seq[GRCh38]del(17)(p12) NC_000017.11:g.14196684_15516686del	46,XX
Y19353	26	NIPT	High-risk NIPT results for other chromosome	21w+4	seq[hg19]dup(18)(p11.32) chr18:g.560001_2160000dup	seq[GRCh38]dup(18)(p11.32) NC_000018.10:g.560001_2160000dup	46,XX
Y19436	26	AFU	NT: 3.4mm	17w+4	seq[hg19]dup(Y)(p11.32q12) chrY:g.1_59373566dup	seq[GRCh38]dup(Y)(p11.32q12) NC_000024.10:g.1_57217415dup	47,XYY
Y19522	26	MSSHR, AFU	Positive Down syndrome screen:Risk:T-21 1/112, Polyhydramnios	25w+1	CNV Normal	CNV Normal	46,XY
Y19551	26	MSSHR	Positive Down syndrome screen:Risk:T-21 1/37	19w+3	CNV Normal	CNV Normal	46,XX
Y19578	26	AFU	Fetal congenital heart disease	27w+5	CNV Normal	CNV Normal	46,XY
Y19635	26	AFU	Fetal lateral ventricle enlargement	24w+6	CNV Normal	CNV Normal	46,XY
Y19644	26	MSSHR	Positive Down syndrome screen:Risk:T21 1/126	19w+4	CNV Normal	CNV Normal	46,XX
Y17308	25	mix	Consanguineous marriage	19w	seq[hg19]dup(X)(q27.2) chrX:g.140340000_140760000dup	seq[GRCh38]dup(X)(q27.2) NC_000023.11:g.141245872_141671842dup	46,XX
Y18109	25	AFU	Fetal hydronephrosis	26w+3	seq[hg19]dup(6)(p12.3) chr6:g.4.440000_47160000dup	seq[GRCh38]dup(6)(p12.3) NC_000006.12:g.4439766_47192264dup	46,XY
Y18168	25	HARO	History of adverse reproductive	19w+1	CNV Normal	CNV Normal	46,XX
Y18321	25	HARO	History of adverse reproductive	17w+4	CNV Normal	CNV Normal	46,XY
Y18458	25	AFU	Positive for ultrasonographic soft markers	26w+1	CNV Normal	CNV Normal	46,XY
Y18512	25	AFU	Positive for ultrasonographic soft markers	23w+1	CNV Normal	CNV Normal	46,XY
Y18643	25	AFU	Absence of nasal bone	26w+4	CNV Normal	CNV Normal	46,XY
Y18659	25	AFU	Fetal congenital heart disease	26w+4	CNV Normal	CNV Normal	46,XY
Y19053	25	HARO	History of adverse reproductive	18w+1	CNV Normal	CNV Normal	46,XX
Y19266	25	mix	Chromosomal abnormalities of pregnant women	18w+4	CNV Normal	CNV Normal	46,XY,inv(5)(p13q15)
Y19384	25	AFU	Absence of nasal bone	24w+1	CNV Normal	CNV Normal	46,XX
Y19470	25	AFU	Fetal congenital heart disease	23w+5	CNV Normal	CNV Normal	46,XX
Y19566	25	MSSHR, AFU	Positive Down syndrome screen:Risk:T-21 1/211, NT:2.4mm	18w+3	CNV Normal	CNV Normal	46,XX
Y21025	28	AFU	Fetal ultrasound structural abnormality	25w+2	CNV Normal	CNV Normal	46,XX
Y19716	25	MSSHR	Positive Down syndrome screen:Risk:T21 1/75	19w+2	seq[hg19]dup(21)(q11.2q22.3) chr21:g.14300000_48129895dup	seq[GRCh38]dup(21)(q11.2q22.3) NC_000021.9:g.12965809_46699983dup	47,XY,+21
Y19734	25	AFU	Fetal ultrasound structural abnormality	24w+5	CNV Normal	CNV Normal	46,XY
Y19744	25	NIPT	High-risk NIPT results for chromosome 17	24w	CNV Normal	CNV Normal	46,XX
Y19765	25	AFU	Positive for ultrasonographic soft markers	18w	CNV Normal	CNV Normal	46,XX
Y17309	24	HARO	History of adverse reproductive	19w+3	CNV Normal	CNV Normal	46,XX
Y18330	24	MSSHR	Positive Down syndrome screen:Risk:T-21 1/118	18w+3	CNV Normal	CNV Normal	46,XY,inv(9)(p11q13)
Y18424	24	MSSHR	Positive Down syndrome screen:Risk:T-21 1/219	23w+2	CNV Normal	CNV Normal	46,XX
Y19246	24	AFU, MSSHR	NT:3.4mm, Positive Down syndrome screen:Risk:T-21 1/246	18w	CNV Normal	CNV Normal	46,XY
Y19316	24	MSSHR	Positive Down syndrome screen:Risk:T-18 1/194	19w+4	CNV Normal	CNV Normal	46,XY
Y19340	24	AFU	Fetal head facial skin hydrops	18w+2	seq[hg19]dup(14)(q24.2) chr14:g.71880001_73620000dup	seq[GRCh38]dup(14)(q24.2) NC_000014.9:g.71413284_73153292dup	46,XX
Y19348	24	HARO	History of adverse reproductive	18w+4	CNV Normal	CNV Normal	46,XY
Y19378	24	MSSHR	Positive Down syndrome screen:Risk:T-21 1/190	19w+4	CNV Normal	CNV Normal	46,XX
Y19481	24	AFU	Fetal congenital heart disease	24w+3	CNV Normal	CNV Normal	46,XX
Y19483	24	HARO	History of adverse reproductive	18w+3	CNV Normal	CNV Normal	46,XY
Y19492	24	AFU	NT：5.2mm	18w+5	CNV Normal	CNV Normal	46,XY
Y19499	24	AFU	Fetal congenital heart disease	25w+1	CNV Normal	CNV Normal	46,XX
Y19530	24	AFU	Absence of nasal bone	23w+6	CNV Normal	CNV Normal	46,XY
Y19645	24	mix	Long-term use of entecavir before and during early pregnancy	19w+4	CNV Normal	CNV Normal	46,XY
Y19752	24	MSSHR	Positive Down syndrome screen:Risk:T21 1/189	19w+2	CNV Normal	CNV Normal	46,XX
Y17170	23	MSSHR	Positive Down syndrome screen:Risk:T-21 1/199	21w+3	CNV Normal	CNV Normal	46,XX,t(3;12)(p14;p13)
Y18096	23	AFU	Fetal ultrasound structural abnormality	25w	CNV Normal	CNV Normal	46,XY
Y18128	23	AFU	Fetal ultrasound structural abnormality	25w+5	CNV Normal	CNV Normal	46,XY
Y18347	23	AFU	Fetal ultrasound structural abnormality	18w+6	CNV Normal	CNV Normal	46,XX
Y18558	23	MSSHR, mix	Positive Down syndrome screen:Risk:T-21 1/74, Oral methimazole in pregnant patients with hyperthyroidism	22w+3	CNV Normal	CNV Normal	46,XY
Y19224	23	AFU	Fetal ultrasound structural abnormality	31w+1	CNV Normal	CNV Normal	46,XX
Y19302	23	MSSHR	Positive Down syndrome screen:Risk:T-18 1/269	19w+6	CNV Normal	CNV Normal	46,XY
Y19463	23	MSSHR	Positive Down syndrome screen:Risk:T-21 1/203	18w+3	CNV Normal	CNV Normal	46,XY
Y19501	23	AFU, NIPT	NT:3.3-3.5mm, High-risk NIPT results for chromosome 21	21w+6	seq[hg19]dup(21)(q11.2q22.3) chr21:g.14300000_48129895dup	seq[GRCh38]dup(21)(q11.2q22.3) NC_000021.9:g.12965809_46699983dup	47,XY,+21
Y19518	23	AFU	Fetal ultrasound structural abnormality	20w+6	seq[hg19]dup(21)(q11.2q22.3) chr21:g.14300000_48129895dup	seq[GRCh38]dup(21)(q11.2q22.3) NC_000021.9:g.12965809_46699983dup	46,XX,rob(21;21)(q10;q10)
Y19711	23	AFU	NT:4.5mm, Fetal congenital heart disease	22w+6	CNV Normal	CNV Normal	46,XX
Y18061	22	AFU	Absence of nasal bone, Fetal lateral ventricle enlargement	27w	CNV Normal	CNV Normal	46,XY
Y18331	22	AFU	NT:4.0mm	23w+4	CNV Normal	CNV Normal	46,XY
CNV4	22	AFU	Fetal ultrasound structural abnormality	26w+3	CNV Normal	CNV Normal	46,XY
Y18444	22	MSSHR	Positive Down syndrome screen:Risk:T-21 1/235	19w+5	CNV Normal	CNV Normal	46,XX
Y19155	22	MSSHR	Positive Down syndrome screen:Risk:T-21 1/61	18w+6	seq[hg19]del(5)(p15.33p15.1) chr5:g.20001_17940000del seq[hg19]dup(7)(q34q36.3) chr7:g.141380001_159138663dup	seq[GRCh38]del(5)(p15.33p15.1) NC_000005.10:g.20001_17939891del seq[GRCh38]dup(7)(q34q36.3) NC_000007.14:g.141680201_159335973dup	46,XY
Y19583	22	AFU	NT：5.0mm	19w+3	seq[hg19]del(X)(p22.31p22.2) chrX:g.8390573_10935401del	seq[GRCh38]del(X)(p22.31p22.2) NC_000023.11:g.8422532_10917281del	46,XX
Y19626	22	AFU	Fetal ultrasound structural abnormality	24w+6	CNV Normal	CNV Normal	46,XY
Y17360B	21	HARO	History of adverse reproductive	22w+6	CNV Normal	CNV Normal	46,XX
Y19303	21	AFU	Fetal ultrasound structural abnormality	24w+6	CNV Normal	CNV Normal	46,XY
Y19337	21	NIPT	High-risk NIPT results for other chromosome	23w+2	CNV Normal	CNV Normal	46,XY
Y17269	20	AFU	Fetal ultrasound structural abnormality	22w+3	CNV Normal	CNV Normal	46,XX
Y19345	20	MSSHR	Positive Down syndrome screen:Risk:T-21 1/316	18w+6	CNV Normal	CNV Normal	46,XY
Y19549	20	mix	Pregnant women with intellectual disability	20w+5	CNV Normal	CNV Normal	46,XX
Y19130	19	NIPT	High-risk NIPT results for chromosome 21	26w+1	seq[hg19]dup(21)(q11.2q22.3) chr21:g.14300000_48129895dup	seq[GRCh38]dup(21)(q11.2q22.3) NC_000021.9:g.12965809_46699983dup	47,XY,+21
Y19216	19	AFU	Fetal congenital heart disease	25w+6	CNV Normal	CNV Normal	46,XY
Y20004	32	MSSHR	Positive Down syndrome screen:Risk:T-21 1/165	19w+4	CNV Normal	CNV Normal	46,XX
Y20006	37	AMA	AMA	20w+1	CNV Normal	CNV Normal	46,XX
Y20007	28	AFU	Fetal ultrasound structural abnormality	25w+4	CNV Normal	CNV Normal	46,XX
Y20008	26	HARO	History of adverse reproductive	19w	CNV Normal	CNV Normal	46,XY
Y20009	23	AFU	FGR	26w+4	seq[hg19]del(7)(q35) chr7:g.145230251_146404472del	seq[GRCh38]del(7)(q35) NC_000007.14:g.145533158_146707380del	46,XX
Y20014	27	AFU	FGR	28w+3	seq[hg19]dup(X)(q25q26.1) chrX:g.128580202_129388393dup	seq[GRCh38]dup(X)(q25q26.1) NC_000023.11:g.129446225_130254419dup	46,XY
Y20013	38	AMA	AMA	21w	CNV Normal	CNV Normal	46,XX,t(8;18)(p21;q11.2)
Y20017	39	AMA	AMA	19w+5	CNV Normal	CNV Normal	46,XY
Y20021	26	AFU	NT:3.3mm	18w	CNV Normal	CNV Normal	46,XX
Y20022	40	AMA, AFU	AMA, Fetal lateral ventricle enlargement	26w+5	seq[hg19]del(16)(p13.3) chr16:g.29567296_30190029del	seq[GRCh38]del(16)(p13.3) NC_000016.10:g.29555975_30178708del	46,XY
Y20023	26	AFU	NT:4.3mm	18w+2	CNV Normal	CNV Normal	46,XY
Y20024	44	AMA	AMA	18w+6	CNV Normal	CNV Normal	46,XX
Y20029	29	AFU	NT:2.8mm	19w+1	CNV Normal	CNV Normal	46,XY
Y20032	38	AMA	AMA	19w+4	CNV Normal	CNV Normal	46,XX
Y20033	25	AFU	Fetal ultrasound structural abnormality	18w+3	CNV Normal	CNV Normal	46,XY
Y20036	30	AFU	NT:3.6-4.0mm	19w	CNV Normal	CNV Normal	46,XY
Y20056	27	HARO	History of adverse reproductive	18w+6	CNV Normal	CNV Normal	46,XY
Y20058	30	AFU	NT:2.8mm	19w	CNV Normal	CNV Normal	46,XY
Y20061	31	mix	Husband was the carrier of translocated chromosome:（46,XY,t(10;12)(q11;p13)	18w+5	CNV Normal	CNV Normal	46,XY,t(10;21)(q11;p13)
Y20062	22	NIPT	High-risk NIPT results for chromosome 9	20w+1	seq[hg19]del(9)(p24.3p22.1) chr9:g.208454_18950989del	seq[GRCh38]del(9)(p24.3p22.1) NC_000009.12:g.208454_18950991del	46,XY,del(9)(p22)
Y20070	39	AMA, HARO	AMA, History of adverse reproductive	23w+5	CNV Normal		46,XX
Y20084	39	AMA, AFU	AMA, Positive for ultrasonographic soft markers	24w+3	CNV Normal		46,XY
Y20086	26	mix	Husband was the carrier of translocated chromosome:（46,XY,t(8;11)(p12;q21)	18w+2	CNV Normal		46,XX,t(8;11)(p12;q21)
Y20102	22	MSSHR	Positive Down syndrome screen:Risk:T-21 1/252	20w+1	seq[hg19]del(16)(p11.2) chr16:g.28810324-29088624del	seq[GRCh38]del(16)(p11.2) NC_000016.10:g.28799003_29077303del	46,XX
Y20104	29	AFU	Absence of nasal bone	29w+3	CNV Normal	CNV Normal	46,XY
Y20110	28	AFU	NT:3.0mm	19w+2	CNV Normal	CNV Normal	46,XX
Y20122	24	AFU	NT:8.3mm	18w+4	CNV Normal	CNV Normal	46,XX
Y20123	36	AMA	AMA	19w+6	CNV Normal	CNV Normal	46,XX
Y20129	36	AMA, AFU	AMA, Positive for ultrasonographic soft markers	30w	CNV Normal	CNV Normal	46,XY
Y20135	28	MSSHR	Positive Down syndrome screen:Risk:T-21 1/186	19w+3	CNV Normal	CNV Normal	46,XX
Y20137	32	AFU	Fetal ultrasound structural abnormality	24w+5	CNV Normal	CNV Normal	46,XX
Y20139	29	AFU	NT:3.6mm	18w+5	CNV Normal	CNV Normal	46,XY
Y20142	27	AFU	NT:2.8mm	18w+5	CNV Normal	CNV Normal	46,XY
Y20150	23	mix	Pregnant women with intellectual disability, History of epilepsy	20w+3	CNV Normal	CNV Normal	46,XY
Y20158	29	AFU	Fetal lateral ventricle enlargement	24w+3	CNV Normal	CNV Normal	46,XY
Y20160	33	AFU	Fetal ultrasound structural abnormality	28w+1	CNV Normal	CNV Normal	46,XX
Y20161	38	AMA	AMA	19w+5	CNV Normal	CNV Normal	46,XY
Y20166	36	AMA	AMA	19w+5	CNV Normal	CNV Normal	46,XX
Y20169	24	AFU	Absence of nasal bone, Fetal congenital heart disease	24w+1	CNV Normal	CNV Normal	46,XY
Y20173	34	AFU	Fetal ultrasound structural abnormality	24w+1	CNV Normal	CNV Normal	46,XX
Y20179	28	AFU	Fetal lateral ventricle enlargement	27w	CNV Normal	CNV Normal	46,XY
Y20180	29	AFU	NT:3.2mm	20w+4	CNV Normal	CNV Normal	46,XY
Y20189	26	AFU	NT:3.0mm	19w	CNV Normal	CNV Normal	46,XY
Y20192	38	AMA, HARO	AMA, History of adverse reproductive	18w+4	CNV Normal	CNV Normal	46,XY
Y20193	28	MSSHR	Positive Down syndrome screen:Risk:T-21 1/162	19w+5	CNV Normal	CNV Normal	46,XY
Y20212	31	AFU	Positive for ultrasonographic soft markers	23w+6	CNV Normal	CNV Normal	46,XY
Y20214	30	AFU	Positive for ultrasonographic soft markers	20w+6	CNV Normal	CNV Normal	46,XY
Y20215	42	AMA	AMA	19w+4	CNV Normal	CNV Normal	46,XY
Y20216	29	AFU	Absence of nasal bone	18w	CNV Normal	CNV Normal	46,XY
Y20218	28	MSSHR	Positive Down syndrome screen:Risk:T-21 1/288	18w+5	CNV Normal	CNV Normal	46,XY
Y20222	27	HARO	History of adverse reproductive	19w+5	CNV Normal	CNV Normal	46,XX
Y20231	33	AFU	Fetal ultrasound structural abnormality	24w+5	CNV Normal	CNV Normal	45,XX,-18[2]/46,XX[48]
Y20237	27	AFU	Bowel echo enhancement, Fetal congenital heart disease	25w	seq[hg19]del(2)(p16.3) chr2:g.51107372_51352282del	seq[GRCh38]del(2)(p16.3) NC_000002.12:g.50880234_51125144del	46,XY
Y20238	39	AMA, AFU	AMA, Positive for ultrasonographic soft markers	24w+3	seq[hg19]dup(2)(p12) chr2:g.78631709_79851089dup	seq[GRCh38]dup(2)(p12) NC_000002.12:g.78404583_79623963dup	46,XY
Y20249	34	AFU	Fetal ultrasound structural abnormality	24w+5	CNV Normal	CNV Normal	46,XY
Y20252	45	AMA, AFU	AMA, Positive for ultrasonographic soft markers	18w+4	CNV Normal	CNV Normal	46,XY
Y20256	29	HARO	History of adverse reproductive	18w	CNV Normal	CNV Normal	46,XX
Y20257	32	AFU	Absence of nasal bone	24w	CNV Normal	CNV Normal	46,XY
Y20258	29	AFU	Fetal ultrasound structural abnormality	23w+6	CNV Normal	CNV Normal	46,XX
Y20270	26	AFU	NT：2.8mm	19w+2	CNV Normal	CNV Normal	46,XY
Y20289	32	HARO	History of adverse reproductive	18w+4	CNV Normal	CNV Normal	46,XY
Y20297	27	AFU	Fetal ultrasound structural abnormality	25w+2	CNV Normal	CNV Normal	46,XY
Y20311	23	AFU	Fetal ultrasound structural abnormality	24w+4	CNV Normal	CNV Normal	46,XX
Y20316	28	AFU, mix	Absence of nasal bone, Pregnancy with gestational diabetes	25w+6	seq[hg19]del(13)(q13.2q13.3) chr13:g.35217781_35996724del	seq[GRCh38]del(13)(q13.2q13.3) NC_000013.11:g.34643644_35422587del	46,XX
Y20328	28	AFU	Fetal lateral ventricle enlargement	24w+4	CNV Normal	CNV Normal	46,XX
Y20341	27	AFU	Fetal lateral ventricle enlargement	25w+4	CNV Normal	CNV Normal	46,XX
Y20343	33	HARO	History of adverse reproductive	19w+1	CNV Normal	CNV Normal	46,XY
Y20350	25	NIPT	High-risk NIPT results for other chromosome	18w+3	CNV Normal	CNV Normal	46,XX
Y20353	36	AMA	AMA	18w+3	CNV Normal	CNV Normal	46,XX
Y20358	28	AFU	Fetal ultrasound structural abnormality	28w	CNV Normal	CNV Normal	46,XX
Y20359	20	AFU	NT:3.2mm	18w+3	CNV Normal	CNV Normal	46,XY
Y20369	40	AMA	AMA	18w+3	CNV Normal	CNV Normal	46,XY
Y20394	40	AMA, mix	AMA, Embryo transfer failed repeatedly	19w+4	CNV Normal	CNV Normal	46,XX
Y20395	27	NIPT	High-risk NIPT results for sex chromosome	19w+4	seq[hg19]del(X)(p22.31) chrX:g. 6455151_8135103del	seq[GRCh38]del(X)(p22.31) NC_000023.11:g.6537110_8167062del	46,XY
Y20396	35	AMA, AFU	AMA, Fetal ultrasound structural abnormality	22w+4	CNV Normal		46,XY
Y20402	38	AMA, AFU	AMA, Single umbilical artery, Left kidney absent	25w	seq[hg19]del(15)(q11.2) chr15:g.22770421_23277436del	seq[GRCh38]del(15)(q11.2) NC_000015.10:g.22595660_23102647del	46,XX
Y20404	28	HARO	History of adverse reproductive	18w+6	CNV Normal	CNV Normal	46,XX
Y20407	25	MSSHR	Positive Down syndrome screen:Risk:18 1/5, Positive Down syndrome screen:Risk:21 1/203	19w+1	seq[hg19]dup(18)(p11.32q23) chr18:g.1_78077248dup	seq[GRCh38]dup(18)(p11.32q23) NC_000018.10:g.10001_80259271dup	47,XX,+18
Y20411	22	mix	Gestational diabetes	18w+6	CNV Normal	CNV Normal	46,XY
Y20414	27	HARO	History of adverse reproductive	19w+6	CNV Normal	CNV Normal	46,XY
Y20437	32	HARO	History of adverse reproductive	18w+2	CNV Normal	CNV Normal	46,XY
Y20441	27	AFU	NT:3.3mm	18w+3	CNV Normal	CNV Normal	46,XX
Y20443	29	mix	History of epilepsy (taking magnesium valproate, clonazepam, oxcarbazepine)	21w	CNV Normal	CNV Normal	46,XX
Y20445	30	AFU	NT:4.5mm	19w+1	seq[hg19]dup(21)(q11.2q22.3) chr21:g.14300000_48129895dup	seq[GRCh38]dup(21)(q11.2q22.3) NC_000021.9:g.12965809_46699983dup	47,XX,+21
Y20461	24	HARO	Down syndrome of previous fetus	18w	CNV Normal	CNV Normal	46,XX
Y20015	34	HARO	History of adverse reproductive	18w+3	CNV Normal	CNV Normal	46,XX
Y20011	27	MSSHR	Positive Down syndrome screen:Risk:T-21 1/130	20w	CNV Normal	CNV Normal	46,XX
Y20010	40	AMA	AMA	18w+1	CNV Normal	CNV Normal	46,XY
Y19710	26	MSSHR	Positive Down syndrome screen:Risk:T-21 1/122	19w	CNV Normal	CNV Normal	46,XX
Y20042	39	AMA	AMA	21w+3	CNV Normal	CNV Normal	47,XY,+mar
Y20043	27	MSSHR	Positive Down syndrome screen:Risk:T-21 1/231	20w+3	CNV Normal	CNV Normal	46,XX
Y20046	27	AFU	NT：3.1mm	20w+6	CNV Normal	CNV Normal	46,XX
Y20047	33	HARO	History of adverse reproductive	19w+6	CNV Normal	CNV Normal	46,XY
Y20048	30	AFU	Fetal ultrasound structural abnormality	26w	CNV Normal	CNV Normal	46,XY
Y20052	27	AFU	Fetal ultrasound structural abnormality	24w	CNV Normal	CNV Normal	46,XX
Y20053	22	HARO	History of adverse reproductive	18w+1	CNV Normal	CNV Normal	46,XY
Y20064	33	MSSHR	Positive Down syndrome screen:Risk:T-21 1/185	19w+2	CNV Normal	CNV Normal	46,XX
Y20037	31	mix	Wife was the balanced translocation carriers:：46,XX,t(3;12)(p22;q24.2)	18w+6	CNV Normal	CNV Normal	46,XX,t(3;12)(p23;q24.2)
Y20065	32	HARO	History of adverse reproductive	23w+2	CNV Normal	CNV Normal	46,XX
Y20071	37	AMA, AFU	AMA, Positive for ultrasonographic soft markers	20w+2	CNV Normal	CNV Normal	46,XY
Y20073	33	MSSHR, HARO	Positive Down syndrome screen:Risk:T-21 1/123, History of adverse reproductive	20w+2	CNV Normal	CNV Normal	46,XY
Y20085	23	HARO	History of adverse reproductive	19w+2	CNV Normal	CNV Normal	46,XX
Y20097	46	AMA	AMA	19w+4	CNV Normal	CNV Normal	46,XX
Y20103	31	AFU	NT:3.6mm	18w+6	CNV Normal	CNV Normal	46,XX
Y20092	42	AMA	AMA	18w+3	CNV Normal	CNV Normal	46,XX,inv(7)(p15q11.2)
Y20066	44	AMA	AMA	23w+6	CNV Normal	CNV Normal	46,XY
Y20109	26	HARO	Encephalocele of the previous fetus	18w+5	seq[hg19]dup(8)(q21.3) chr8:g.92040001_93280000dup	seq[GRCh38]dup(8)(q21.3) NC_000008.11:g.91027773_92267772dup	46,XX
Y20111	32	MSSHR	Positive Down syndrome screen:Risk:T-21 1/197	19w+2	CNV Normal	CNV Normal	46,XX
Y20117	25	AFU	Fetal ultrasound structural abnormality	27w+2	CNV Normal	CNV Normal	46,XY
Y20120	24	AFU	Fetal persistent left superior vena cava	23w+5	seq[hg19]dup(18)(q23) chr18:g.74480001_75700000dup	seq[GRCh38]dup(18)(q23) NC_000018.10:g.76768045_77988044 dup	46,XX
Y20134	31	MSSHR	Positive Down syndrome screen:Risk:T-21 1/258	18w+6	CNV Normal	CNV Normal	46,XY
Y20140	28	AFU	Fetal ultrasound structural abnormality	25w+2	CNV Normal	CNV Normal	46,XY
Y20144	30	MSSHR	Positive Down syndrome screen:Risk:T-21 1/220	18w+1	CNV Normal	CNV Normal	46,XX
Y20118R	33	HARO	History of bearing child with chromosome abnormalities	23w+1	seq[hg19]del(16)(p12.2) chr16:g.21940001_22440000del	seq[GRCh38]del(16)(p12.2) NC_000016.10:g.21928680_22428679del	46,XX
Y20145	32	AFU	Absence of nasal bone	31w	CNV Normal	CNV Normal	46,XX
Y20146	28	MSSHR	Positive Down syndrome screen:Risk:T-21 1/269	24w+1	CNV Normal	CNV Normal	46,XX
Y20152	40	AMA, AFU	AMA, Positive for ultrasonographic soft markers	19w+6	CNV Normal	CNV Normal	46,XX
Y20153	22	NIPT	High-risk NIPT results for chromosome 5	20w	CNV Normal	CNV Normal	46,XY
Y20155	23	AFU, MSSHR	NT: 3.0mm, Positive Down syndrome screen:Risk:T-21 1/164	20w+4	CNV Normal	CNV Normal	46,XY
Y20163	28	MSSHR	Positive Down syndrome screen:Risk:T-21 1/202	19w+2	CNV Normal	CNV Normal	46,XX
Y20165	23	AFU	NT：2.8mm	19w	CNV Normal	CNV Normal	46,XX
Y20170	26	MSSHR	Positive Down syndrome screen:Risk:T-21 1/166	18w+3	seq[hg19]dup(22)(q11.21) chr22:g.18880001_21480000dup	seq[GRCh38]dup(22)(q11.21) NC_000022.11:g.18892488_21125711dup	46,XX
Y20184	34	MSSHR	Positive Down syndrome screen:Risk:T-21 1/162	19w	CNV Normal	CNV Normal	46,XX
Y20171	20	MSSHR	Positive Down syndrome screen:Risk:T-21 1/103	18w+4	CNV Normal	CNV Normal	46,XY
Y20188	28	HARO	First birth induced by multiple deformities (TOP)	19w+6	CNV Normal	CNV Normal	46,XX
Y20196	28	MSSHR	Positive Down syndrome screen:Risk:T-21 1/8	18w+4	CNV Normal	CNV Normal	46,XY
Y20197	32	MSSHR	Positive Down syndrome screen:Risk:T-21 1/60	18w+5	CNV Normal	CNV Normal	46,XX
Y20199	30	NIPT	High-risk NIPT results for other chromosome	20w+1	CNV Normal	CNV Normal	46,XY
Y20203	35	AMA, NIPT	AMA, High-risk NIPT results for other chromosome	19w	CNV Normal	CNV Normal	46,XX
Y20205	38	AMA	AMA	18w+4	CNV Normal	CNV Normal	46,XX
Y20207	38	AMA	AMA	18w+2	CNV Normal	CNV Normal	46,XX
Y20211	40	AMA	AMA	21w+1	CNV Normal	CNV Normal	46,XX
Y20213	26	AFU	NT: 3.1mm	18w+2	CNV Normal	CNV Normal	46,XY
Y20220	27	HARO	History of adverse reproductive	18w+6	CNV Normal	CNV Normal	46,XY
Y20224	22	HARO	History of adverse reproductive	25w+1	CNV Normal	CNV Normal	46,XY
Y20227	35	AMA, AFU	AMA, NT:4.7mm	18w+3	seq[hg19]dup(21)(q11.2q22.3) chr21:g.14300000_48129895dup	seq[GRCh38]dup(21)(q11.2q22.3) NC_000021.9:g.12965809_46699983dup	47,XY,+21
Y20228	44	AMA	AMA	18w+4	CNV Normal		46,XX
Y20229	26	HARO	History of adverse reproductive	19w+3	CNV Normal		46,XX
Y20230	31	AFU	Fetal ultrasound structural abnormality	24w	seq[hg19]dup(X)(p22.33q28) chrX:g.1_155270560dup	seq[GRCh38]dup(X)(p22.33q28) NC_000023.11:g.10001_156030895dup	47, XXY
Y20234	28	MSSHR	Positive Down syndrome screen:Risk:T-21 1/207	18w+4	CNV Normal	CNV Normal	46,XX
Y20253	39	AMA	AMA	18w+5	CNV Normal	CNV Normal	46,XY
Y20260	34	NIPT	High-risk NIPT results for other chromosome	20w+4	seq[hg19]dup(15)(q11.2q13.1) chr15:g.23620001_28540000dup	seq[GRCh38]dup(15)(q11.2q13.1) NC_000015.10:g.23374854_28294854dup	46,XX
Y20261	26	MSSHR, mix	Positive Down syndrome screen, Pregnant women have intellectual disability	19w+1	CNV Normal	CNV Normal	46,XY
Y20266	34	HARO	History of adverse reproductive	19w	CNV Normal	CNV Normal	46,XY
Y20268	26	AFU	Absence of nasal bone	25w+3	CNV Normal	CNV Normal	46,XX
Y20269	26	AFU	Fetal congenital heart disease	23w+6	CNV Normal	CNV Normal	46,XX
Y20272	35	AMA	AMA	18w+6	CNV Normal	CNV Normal	46,XY
Y20277	25	HARO	History of adverse reproductive	22w+6	CNV Normal	CNV Normal	46,XY
Y20286	39	AMA, NIPT	AMA, High-risk NIPT results for chromosome 8	19w+1	CNV Normal	CNV Normal	46,XY
Y20278	28	mix	Chromosomal abnormalities of pregnant women	18w+3	seq[hg19]del(1)(p36.33p36.32) chr1:g.820001_2740000del	seq[GRCh38]del(1)(p36.33p36.32) NC_000001.11:g.884621_2823435del	46,XY
Y20288	27	NIPT	High-risk NIPT results for chromosome 18	18w+3	CNV Normal	CNV Normal	46,XX
Y20290	28	MSSHR	Positive Down syndrome screen:Risk:T-18 1/98, T-21 1/268	21w+1	CNV Normal	CNV Normal	46,XY
Y20293	32	MSSHR	Positive Down syndrome screen:Risk:T-21 1/109	19w+1	CNV Normal	CNV Normal	46,XY
Y20295	24	MSSHR, AFU	Positive Down syndrome screen:Risk:T-21 1/243, FGR	27w+1	CNV Normal	CNV Normal	46,XX
Y20307	31	AFU	Positive for ultrasonographic soft markers	24w+1	CNV Normal	CNV Normal	46,XX
Y20308	26	AFU	Fetal ultrasound structural abnormality	25w+1	CNV Normal	CNV Normal	46,XY
Y20310	27	AFU	Fetal ultrasound structural abnormality	24w+2	CNV Normal	CNV Normal	46,XY
Y20314	40	AMA	AMA	18w+4	CNV Normal	CNV Normal	46,XY
Y20315	38	AMA	AMA	18w+4	seq[hg19]dup(13)(q14.3) chr13:g.53180000_54320000dup	seq[GRCh38]dup(13)(q14.3) NC_000013.11:g.52605865_53745865dup	46,XY
Y20317	28	AFU	Fetal ultrasound structural abnormality	23w+6	CNV Normal	CNV Normal	46,XY
Y20318	31	AFU	Fetal ultrasound structural abnormality	19w+3	CNV Normal	CNV Normal	46,XY
Y20322	39	AMA	AMA	24w+6	CNV Normal	CNV Normal	46,XY
Y20323	27	MSSHR	Positive Down syndrome screen:Risk:T-21 1/8	18w+4	CNV Normal	CNV Normal	46,XX
Y20325	33	MSSHR	Positive Down syndrome screen:Risk:T-21 1/243 Positive Down syndrome screen:Risk:T-18 1/292	18w+4	CNV Normal	CNV Normal	46,XY
Y20326	37	AMA, HARO	AMA, Chromosomal microdeletion syndrome of previous fetus	19w	seq[hg19]del(9)(p24.3p24.1) chr9:g.200000_6760000del seq[hg19]dup(20)(p13p12.3) chr20:g.60000_8120000dup	seq[GRCh38]del(9)(p24.3p24.1) NC_000009.12:g.200000_6760000del seq[GRCh38]dup(20)(p13p12.3) NC_000020.11:g.79360_8139353dup	46,XX
Y20333	35	AMA, AFU	AMA, Fetal congenital heart disease	24w+2	CNV Normal	CNV Normal	46,XY
Y20334	28	MSSHR	Positive Down syndrome screen:Risk:T-21 1/167	18w+3	CNV Normal	CNV Normal	46,XY
Y20335	31	mix	Pregnancy complicated with epilepsy	18w+4	CNV Normal	CNV Normal	46,XY
Y20347	24	NIPT	High-risk NIPT results for other chromosome	18w+4	CNV Normal	CNV Normal	46,XY
Y20349	40	AMA	AMA	19w+2	CNV Normal	CNV Normal	46,XX
Y20351	24	AFU	Fetal ultrasound structural abnormality	25w	CNV Normal	CNV Normal	46,XY
Y20352	24	AFU	Fetal congenital heart disease	26w	CNV Normal	CNV Normal	46,XY
Y20355	35	AMA	AMA	19w+3	CNV Normal	CNV Normal	46,XY
Y20417	25	MSSHR	Positive Down syndrome screen:Risk:T-21 1/259, Positive Down syndrome screen:Risk:T-18 1/93	18w+2	CNV Normal	CNV Normal	46,XY
Y20356	43	AMA	AMA	20w	CNV Normal	CNV Normal	46,XX
Y20358	28	AFU	Fetal ultrasound structural abnormality	28w	CNV Normal	CNV Normal	46,XX
Y20360	25	NIPT	High-risk NIPT results for sex chromosome	19w+1	seq[hg19]del(X)(p22.33q28)(mos) chrX:g.1_155270560del	seq[GRCh38]del(X)(p22.33q28)(mos) NC_000023.11:g.10001_156030895del	mos 45,X[24]/47,XXX[16]
Y20361	23	AFU	Fetal ultrasound structural abnormality	23w+5	CNV Normal	CNV Normal	46,XY
Y20365	26	AFU	NT:4.4mm	18w+3	CNV Normal	CNV Normal	46,XX
Y20371	35	AMA, AFU	AMA, NF:7.8mm	25w+5	CNV Normal	CNV Normal	46,XX
Y20381	39	AMA	AMA	18w	CNV Normal	CNV Normal	46,XY
Y20382	21	mix	Twins (one survived and one stopped developing)	18w+1	CNV Normal	CNV Normal	46,XX
Y20383	15	AFU	Fetal lateral ventricle enlargement	23w+5	CNV Normal	CNV Normal	46,XY
Y20385	37	AMA	AMA	18w+6	CNV Normal	CNV Normal	46,XY
Y20386	27	AFU	Absence of nasal bone	19w+3	CNV Normal	CNV Normal	46,XY
Y20387	33	MSSHR	Positive Down syndrome screen:Risk:T-21 1/79	20w+1	CNV Normal	CNV Normal	46,XY
Y20388	36	AMA, MSSHR	AMA, Positive Down syndrome screen:Risk:T-21 1/251	20w+2	CNV Normal	CNV Normal	46,XY
Y20389	31	AFU	Absence of nasal bone	25w+4	CNV Normal	CNV Normal	46,XY
Y20391	39	AMA	AMA	18w+6	CNV Normal	CNV Normal	46,XY
Y20392	35	AMA, MSSHR, AFU	AMA, Positive Down syndrome screen:Risk:T-21 1/267, Absence of nasal bone	20w	CNV Normal	CNV Normal	46,XX
Y20398	28	AFU	Fetal congenital heart disease	26w+5	CNV Normal	CNV Normal	46,XY
Y20399	28	AFU	Fetal ultrasound structural abnormality	26w+5	CNV Normal	CNV Normal	46,XX
Y20400	32	HARO, AFU	Down syndrome of previous fetus, Absence of nasal bone	18w+2	seq[hg19]dup(13)(q21.1) chr13:g.55540000_56920000dup	seq[GRCh38]dup(13)(q21.1) NC_000013.11:g.54965865_56345866dup	46,XY
Y20415	36	AMA	AMA	19w	seq[hg19]del(9)(p24.3p23) chr9:g.200000_13580000del seq[hg19]dup(9)(p23p13.1) chr9:g.13580000_38780000dup	seq[GRCh38]del(9)(p24.3p23) NC_000009.12:g.200000_13580001del seq[GRCh38]dup(9)(p23p13.1) NC_000009.12:g.13580001_38780003dup	46,XX,der(9)del(9)(p23p24.3)dup(9)(p13.1p23)
Y20419	28	MSSHR	Positive Down syndrome screen:Risk:T-21:1/84	19w+1	CNV Normal		46,XY
Y20424	32	MSSHR	Positive Down syndrome screen:Risk:T-21：1/51	20w	CNV Normal		46,XX
Y20421	42	AMA, NIPT	AMA, High-risk NIPT results for chromosome 21	20w+4	seq[hg19]dup(21)(q11.2q22.3) chr21:g.14300000_48129895dup	seq[GRCh38]dup(21)(q11.2q22.3) NC_000021.9:g.12965809_46699983dup	47,XX,+21
Y20425	30	AFU	NT:3.1mm	18w	CNV Normal		46,XY
Y20426	29	AFU	NT:5.5mm	18w+4	seq[hg19]dup(21)(q11.2q22.3) chr21:g.14300000_48129895dup	seq[GRCh38]dup(21)(q11.2q22.3) NC_000021.9:g.12965809_46699983dup	47,XX,+21
Y20427	29	mix	NIPT detection failed	20w+1	CNV Normal	CNV Normal	46,XX
Y20430	38	AMA, NIPT	AMA, High-risk NIPT results for chromosome 21	18w+5	CNV Normal	CNV Normal	46,XY
Y20433	41	AMA	AMA	29w+4	CNV Normal	CNV Normal	46,XY
Y20435	31	AFU	NT:3.8mm	18w+1	CNV Normal	CNV Normal	46,XY
Y20436	29	AFU	Fetal ultrasound structural abnormality	24w+5	CNV Normal	CNV Normal	46,XY
Y20439	35	AMA, AFU	AMA, Fetal congenital heart disease	23w	CNV Normal	CNV Normal	46,XX
Y20440	35	AMA, HARO	AMA, History of adverse reproductive	19w+1	CNV Normal	CNV Normal	46,XY
Y20444	42	AMA	AMA	19w+2	CNV Normal	CNV Normal	46,XX,?del(5)(p15.3)
Y20448	39	AMA	AMA	18w+3	CNV Normal	CNV Normal	46,XY
Y20449	43	AMA	AMA	20w+2	CNV Normal	CNV Normal	46,XX
Y20453	35	AMA, mix	AMA, Gestational diabetes	18w+1	CNV Normal	CNV Normal	46,XY
Y20455	23	AFU	Fetal ultrasound structural abnormality	24w	CNV Normal	CNV Normal	46,XY
Y20456	30	MSSHR	Positive Down syndrome screen:Risk:T-21 1/209	18w+5	CNV Normal	CNV Normal	46,XX
Y20457	30	mix	Pregnant woman ask for prenatal diagnosis	19w	CNV Normal	CNV Normal	46,XX
Y20458	30	MSSHR	Positive Down syndrome screen:Risk:T-21 1/243	18w+3	CNV Normal	CNV Normal	46,XX
Y20460	26	AFU	NT:3.0mm	18w+5	seq[hg19]del(X)(p22.33q28) chrX:g.1_155270560del	seq[GRCh38]del(X)(p22.33q28) NC_000023.11:g.10001_156030895del	45, X
Y20462	26	MSSHR	Positive Down syndrome screen:Risk:T-18 1/33	18w+4	CNV Normal	CNV Normal	46,XY
Y20463	32	MSSHR	Positive Down syndrome screen:Risk:T-21 1/117	18w+4	CNV Normal	CNV Normal	46,XX
Y20464	31	AFU	NT:3.4mm	19w+1	CNV Normal	CNV Normal	46,XY
Y20466	31	AFU	NT:3.5-4.0mm	18w+1	CNV Normal	CNV Normal	46,XY
Y20467	25	AFU	NT:3.4mm	18w+5	CNV Normal	CNV Normal	46,XY
Y20468	26	AFU	Positive for ultrasonographic soft markers, Fetal congenital heart disease	25w	CNV Normal	CNV Normal	46,XX
Y20469	23	AFU	Fetal ultrasound structural abnormality	28w+4	CNV Normal	CNV Normal	46,XY
Y20470	31	NIPT	High-risk NIPT results for chromosome 8	18w+5	CNV Normal	CNV Normal	46,XX
Y20471	29	AMA(paternal)	AMA (advanced paternal age, 50 years old)	20w+1	CNV Normal	CNV Normal	46,XY
Y20478	22	AFU	Right aortic arch, ventricular septal defect	25w+1	seq[hg19]del(15)(q11.2) chr15:g.22760000_23060000del	seq[GRCh38]del(15)(q11.2) NC_000015.10:g.22813068_23113068del	46,XY
Y20483	38	AMA, mix	AMA, Pregnancy complicated with schizophrenia	20w+2	CNV Normal	CNV Normal	46,XY
Y20484	33	AFU	Positive for ultrasonographic soft markers	25w+2	CNV Normal	CNV Normal	46,XY
Y20485	23	AFU	Fetal lateral ventricle enlargement	26w+5	CNV Normal	CNV Normal	46,XX
Y20486	29	mix	NIPT detection failed	23w+3	CNV Normal	CNV Normal	46,XY
Y20488	32	AFU	NT:3.0mm	18w+2	CNV Normal	CNV Normal	46,XY
Y20489	32	AFU	Fetal ventriculomegaly	24w+1	seq[hg19]del(7)(q31.1) chr7:g.110800000_111100000del	seq[GRCh38]del(7)(q31.1) NC_000007.14:g.111159944_111459944del	46,XY
Y20490	29	AFU	NT:3.3mm	18w+3	CNV Normal	CNV Normal	46,XY
Y20493	34	AFU	Fetal ultrasound structural abnormality	19w+2	CNV Normal	CNV Normal	46,XY
Y21004	33	AFU	NT:2.7mm	19w+1	CNV Normal	CNV Normal	46,XY
Y21001	32	HARO	History of adverse reproductive	18w+6	CNV Normal	CNV Normal	46,XX
Y21003	33	AFU	NT:2.7mm	20w+1	CNV Normal	CNV Normal	46,XY
Y21004	20	HARO	History of adverse reproductive	19w+1	CNV Normal	CNV Normal	46,XX
Y21005	25	HARO	History of adverse reproductive	18w+5	CNV Normal	CNV Normal	46,XY
Y21008	35	AMA, mix	AMA, Gestational diabetes	19w+2	CNV Normal	CNV Normal	46,XX
Y21010	27	NIPT	High-risk NIPT results for chromosome 4	19w	CNV Normal	CNV Normal	46,XY
Y21014	32	AFU	Fetal lateral ventricle enlargement	27w+3	CNV Normal	CNV Normal	46,XY
Y21001	32	HARO	History of adverse reproductive(TOP)	18w+6	CNV Normal	CNV Normal	46,XX
Y21003	33	AFU	NT:2.7mm	20w+1	CNV Normal	CNV Normal	46,XY
Y21004	20	HARO	History of adverse reproductive	19w+1	CNV Normal	CNV Normal	46,XX
Y21005	25	HARO	The first-born had cleft palate and neurodevelopmental dysplasia.	18w+5	CNV Normal	CNV Normal	46,XY
Y21008	35	AMA, mix	AMA, Gestational diabetes	19w+2	CNV Normal	CNV Normal	46,XX
Y21010	27	NIPT	High-risk NIPT results for chromosome 4	19w	CNV Normal	CNV Normal	46,XY
Y21014	32	AFU	Fetal lateral ventricle enlargement	27w+3	CNV Normal	CNV Normal	46,XY
Y21015	31	NIPT	High-risk NIPT results for other chromosome	21w	CNV Normal	CNV Normal	46,XY
Y21021	33	MSSHR, AFU	Positive Down syndrome screen:Risk:T-21 1/265, Fetal ultrasound structural abnormality	19w+4	CNV Normal	CNV Normal	46,XX
Y21023	25	NIPT	High-risk NIPT results for other chromosome	18w+6	seq[hg19]dup(4)(q12q13.1) chr4:g.58180000_62720000dup VUS	seq[GRCh38]dup(4)(q12q13.1) chr4:g.57313834_61854282dup VUS	46,XY
Y21024	31	AMA(paternal)	AMA (advanced paternal age, 48 years old）	18w+3	CNV Normal	CNV Normal	46,XX,inv(6)(p11q15)
Y21025	28	AFU	Left renal double pelvis, left renal ureteral dilatation	25w+2	CNV Normal	CNV Normal	46,XX
Y21026	25	NIPT	High-risk NIPT results for sex chromosome	18w+6	seq[hg19]del(X)(p22.33q28) chrX:g.1_155270560del	seq[GRCh38]del(X)(p22.33q28) NC_000023.11:g.10001_156030895del	mos45,X[33]/46,XX[17]
Y21028	39	AMA, AFU	AMA, Positive for ultrasonographic soft markers	18w+5	seq[hg19]dup(18)(p11.32q23) chr18:g.1_78077248dup	seq[GRCh38]dup(18)(p11.32q23) NC_000018.10:g.10001_80259271dup	47,XY,+18
Y21029	26	mix	Twins (one survived and one stopped developing)	18w+6	CNV Normal	CNV Normal	46,XX
Y21034	32	MSSHR	Positive Down syndrome screen:Risk:T-21：1/254	18w+5	CNV Normal	CNV Normal	46,XY
Y21035	33	HARO	Down syndrome of previous fetus	19w+5	CNV Normal	CNV Normal	46,XY
Y21036	39	AMA, HARO	AMA, History of adverse reproductive	18w+4	CNV Normal	CNV Normal	46,XX
Y21037	40	AMA	AMA	18w+6	CNV Normal	CNV Normal	46,XY
Y21038	36	AMA, HARO	AMA, History of adverse reproductive	19w	CNV Normal	CNV Normal	46,XY
Y21040	29	NIPT	High-risk NIPT results for 21chromosome	20w+2	seq[hg19]dup(21)(q11.2q22.3) chr21:g.14300000_48129895dup	seq[GRCh38]dup(21)(q11.2q22.3) NC_000021.9:g.12965809_46699983dup	47,XY,+21
Y21042	34	MSSHR	Positive Down syndrome screen:Risk:T-21:1/35	19w+2	CNV Normal	CNV Normal	46,XX
Y21043	26	MSSHR	Positive Down syndrome screen:Risk:T-21:1/36	18w+4	CNV Normal	CNV Normal	46,XY
Y21046	35	AMA, HARO	AMA, The previous fetus was induced due to congenital heart disease	18w+3	CNV Normal	CNV Normal	46,XY
Y21050	22	AFU	Fetal lateral ventricle enlargement	22w	CNV Normal	CNV Normal	46,XY
Y21051	21	NIPT	High-risk NIPT results for sex chromosome	22w+3	CNV Normal	CNV Normal	46,XY
Y21052	29	AFU	NT:3.9mm	19w+4	CNV Normal	CNV Normal	46,XY
Y21054	27	AFU	NT:3.1mm	19w+4	CNV Normal	CNV Normal	46,XY
Y21055	37	AFU, AMA	NT:3.1mm, AMA	18w+4	CNV Normal	CNV Normal	46,XX
Y21059	42	AMA	AMA	22w+2	CNV Normal	CNV Normal	46,XX
Y21062	29	mix	Cytomegalovirus Positive	20w+3	CNV Normal	CNV Normal	46,XX
Y21063	29	HARO	The previous fetus was induced due to mild hydrocephalus	18w+6	CNV Normal	CNV Normal	46,XX
Y21068	35	AMA	AMA	19w+4	CNV Normal	CNV Normal	46,XX
Y21074	32	HARO	Chromosomal microdeletion syndrome of previous fetus	19w+4	CNV Normal	CNV Normal	46,XY
Y21081	32	AFU	NT:3.3mm	18w+3	CNV Normal	CNV Normal	46,XY
Y21084	36	AMA, AFU	AMA, Polyhydramnios and large gastric vesicle volume	30w+4	CNV Normal	CNV Normal	46,XY
Y21088	21	AFU	Nasal bone dysplasia	26w+1	CNV Normal	CNV Normal	46,XX
Y21089	30	AFU	NT:3.9mm	19w	CNV Normal	CNV Normal	46,XY
Y21090	26	AFU	Fetal lateral ventricle enlargement	30w+3	CNV Normal	CNV Normal	46,XY
Y21091	24	AFU	Nasal bone dysplasia	25w+6	CNV Normal	CNV Normal	46,XX
Y21092	31	NIPT	High-risk NIPT results for sex chromosome	18w	CNV Normal	CNV Normal	46,XY
Y21093	30	AFU	NT:3.9mm	19w+6	CNV Normal	CNV Normal	46,XY
Y21094	29	mix	Husband was the carrier of translocated chromosome	22w+1	CNV Normal	CNV Normal	46,XX
Y21097	35	AMA, HARO	AMA, History of adverse reproductive twice	19w+1	CNV Normal	CNV Normal	46,XY
Y21098	27	AFU	Positive for ultrasonographic soft markers	24w+2	CNV Normal	CNV Normal	46,XY
Y21101	29	MSSHR	Positive Down syndrome screen:T-21:1/158	19w+5	CNV Normal	CNV Normal	46,XY
Y21102	45	AMA	AMA	19w+6	CNV Normal	CNV Normal	46,XX
Y21103	45	AMA	AMA	26w+4	CNV Normal	CNV Normal	46,XY
Y21104	35	AMA, HARO, mix	AMA, History of adverse reproductive, After PGS operation	17w+6	CNV Normal	CNV Normal	46,XY
Y21105	27	AFU	FGR	26w+1	CNV Normal	CNV Normal	46,XX
Y21106	35	AMA, AFU	AMA, choroid plexus cyst	18w+2	CNV Normal	CNV Normal	46,XY
Y21108	24	AFU	NT：2.7mm	18w+5	CNV Normal	CNV Normal	46,XY
Y21111	34	MSSHR	Positive Down syndrome screen:T-21:1/10	19w+3	CNV Normal	CNV Normal	46,XY
Y21112	31	MSSHR	Positive Down syndrome screen:T-21:1/219	18w+6	CNV Normal	CNV Normal	46,XY
Y21114	33	MSSHR	Positive Down syndrome screen:T-21:1/270	19w	CNV Normal	CNV Normal	46,XX
Y21115	35	AMA	AMA	18w+5	CNV Normal	CNV Normal	46,XY
Y21116	35	AMA	AMA	19w+2	CNV Normal	CNV Normal	46,XX
Y21117	20	AFU	Single umbilical artery, small right kidney, the left renal pelvis of the fetus was slightly separated	24w+2	CNV Normal	CNV Normal	46,XY
Y21118	30	HARO	The last fetus was induced due to fetal hydrops	19w	seq[hg19]dup(8)(p21.2) chr8:g.23900000_25200000dup	seq[GRCh38]dup(8)(p21.2) NC_000008.11:g.24042487_25342484dup VUS	46,XY
Y21119	35	AMA	AMA	18w	CNV Normal	CNV Normal	46,XY
Y21120	23	HARO	The last fetus was induced due to trisomy 21	18w+1	CNV Normal	CNV Normal	46,XY
Y21121	38	AMA	AMA	20w+2	CNV Normal	CNV Normal	46,XX
Y21122	32	MSSHR	Positive Down syndrome screen:T-21：1/21	19w+1	CNV Normal	CNV Normal	46,XX（2021-07-21 Intrauterine death at 34W gestation）
Y21123	28	MSSHR	Positive Down syndrome screen:T-21：1/270	19w+4	CNV Normal	CNV Normal	46,XX
Y21124	26	MSSHR, AFU	Positive Down syndrome screen:T-21：1/58, Nasal bone dysplasia	19w+6	CNV Normal	CNV Normal	46,XY
Y21125	36	AMA	AMA	18w+5	CNV Normal	CNV Normal	46,XY
Y21127	38	AMA	AMA	18w+5	CNV Normal	CNV Normal	46,XY
Y21128	32	MSSHR	Positive Down syndrome screen:T-21:1/64	27w+4	CNV Normal	CNV Normal	46,XY
Y21129	25	AFU	NT:3.7mm	18w+4	CNV Normal	CNV Normal	46,XY
Y21130	37	AMA	AMA	20w+1	CNV Normal	CNV Normal	46,XX
Y21131	28	AFU	Nasal bone dysplasia	25w+4	CNV Normal	CNV Normal	46,XY
Y21132	36	AMA	AMA	18w+1	CNV Normal	CNV Normal	46,XX
Y21134	29	mix	Require prenatal diagnosis	19w+4	CNV Normal	CNV Normal	46,XX
Y21137	21	AFU	Fetal ultrasound structural abnormality	25w	CNV Normal	CNV Normal	46,XY
Y21138	38	AMA	AMA	19w+3	CNV Normal	CNV Normal	46,XX
Y21139	31	mix	High-risk couples with deafness genes	23w+1	CNV Normal	CNV Normal	46,XY
Y21140	23	NIPT	High-risk NIPT results for 22 chromosome	19w+2	CNV Normal	CNV Normal	46,XX
Y21142	28	AFU	NT:3.7mm	18w+4	CNV Normal	CNV Normal	46,XY
Y21144	30	AFU	NF:7.1mm	23w+1	CNV Normal	CNV Normal	46,XY
Y21145	27	NIPT	High-risk NIPT results for 18 chromosome	18w+2	seq[hg19]del(18)(q21.31q23) chr18:g.55860000_78020000delseq[hg19]del(18)(p11.32) chr18:g.140000_1160000del	seq[GRCh38]del(18)(q21.31q23) NC_000018.10:g.58192768_80259271delseq[GRCh38]del(18)(p11.32) NC_000018.10:g.140000_1159999del	45,XY,-18[9]/46,XY,?r(18)(p11.32q21.31)[48]
Y21146	19	AFU	choroid plexus cyst	19w+5	CNV Normal	CNV Normal	46,XX
Y21149	31	AFU	Fetal lateral ventricle enlargement	28w+5	CNV Normal	CNV Normal	46,XY
Y21153	28	HARO	The previous fetus was induced due to congenital heart disease	20w+3	CNV Normal	CNV Normal	46,XY
Y21155	26	AFU	B-ultrasound showed that the twelve ribs of the fetus were not shown, intracardiac echogenic focus	28w+1	CNV Normal	CNV Normal	46,XX
Y21156	34	AFU	Large gastric vesicle volume	30w+6	CNV Normal	CNV Normal	46,XX
Y21159	32	MSSHR	Positive Down syndrome screen:T-21:1/113	22w+5	CNV Normal	CNV Normal	46,XX
Y21161	35	AMA, AFU	AMA, NT:3.0mm	18w+6	CNV Normal	CNV Normal	46,XX
Y21162	42	AMA	AMA	18w+1	seq[hg19]dup(3)(q24) chr3:g.144240000_145900000dup	seq[GRCh38]dup(3)(q24) NC_000003.12:g.144521158_146182213dup	46,XY
Y21163	41	AMA	AMA	21w+3	CNV Normal	CNV Normal	46,XY
Y21164	35	AMA, HARO	AMA, Microphthalmos of the first-born	20w+3	CNV Normal	CNV Normal	46,XY
Y21170	34	AFU	Short long bone	31w+4	seq[hg19]dup(2)(q37.3) chr2:g.237460000_243020000dup	seq[GRCh38]dup(2)(q37.3) NC_000002.12:g.236551357_242077849dup	46,XX
Y21171	31	AFU	Fetal hydronephrosis	28w+2	CNV Normal	CNV Normal	46,XY
Y21173	25	AFU	NT:3.1mm	18w+1	CNV Normal	CNV Normal	46,XX
Y21176	37	AMA	AMA	18w+5	CNV Normal	CNV Normal	46,XX
Y21177	34	AFU	Ventricular septal defect	24w+3	CNV Normal	CNV Normal	46,XX
Y21179	24	AFU	Fetal lateral ventricle enlargement	30w	CNV Normal	CNV Normal	46,XX
Y21180	28	MSSHR	Positive Down syndrome screen:T-21:1/290	20w	CNV Normal	CNV Normal	46,XY
Y21181	30	AFU	NF:9.1mm, Cerebellar hemispheric separation	18w+5	seq[hg19]dup(13)(q12.11q34) chr13:g.19500000_115169878dup	seq[GRCh38]dup(13)(q12.11q34) NC_000013.11:g.18925860_114344403dup	46,XY,rob(13;14)(q10;q10),+13
Y21182	29	MSSHR	Positive Down syndrome screen:T-21:1/206	19w+1	CNV Normal	CNV Normal	46,XX
Y21183	40	AMA	AMA	18w+4	CNV Normal	CNV Normal	46,XY
Y21184	26	AFU	NT:3.1mm	18w+1	CNV Normal	CNV Normal	46,XX
Y21185	33	MSSHR	Positive Down syndrome screen:T-21:1/90	18w+4	CNV Normal	CNV Normal	46,XY
Y21186	32	MSSHR	Positive Down syndrome screen:T-21:1/56	18w+1	seq[hg19]dup(12)(q23.2q23.3) chr12:g.102800000_104260000dup	seq[GRCh38]dup(12)(q23.2q23.3) NC_000012.12:g.102406222_103866222dup VUS	46,XX
Y21187	34	HARO	History of adverse reproductive	19w+1	CNV Normal	CNV Normal	46,XY
Y21188	27	HARO	History of adverse reproductive	19w+1	CNV Normal	CNV Normal	46,XX
Y21189	26	AFU	Ventricular septal defect	18w+2	CNV Normal	CNV Normal	46,XX
Y21190	26	mix	Suspected pathogenic gene mutation of ATP1A2 gene(AD)	21w+2	CNV Normal	CNV Normal	46,XX
Y21194	23	AFU	Ventricular septal defect, Single umbilical artery	24w+1	CNV Normal	CNV Normal	46,XY
Y21195	25	AFU	Fetal lateral ventricle enlargement	29w+3	CNV Normal	CNV Normal	46,XX
Y21196	33	AFU	Intracardiac echogenic focus and mild dilatation of the bowel behind the bladder	23w+3	CNV Normal	CNV Normal	46,XY
Y21198	31	AFU	Repeated kidney, hydronephrosis	18w+4	CNV Normal	CNV Normal	46,XY
Y21203	35	AMA, mix	AMA , Congenital heart disease in pregnant women	20w+3	CNV Normal	CNV Normal	46,XY
Y21205	33	AFU	NT:3.0mm	20w+5	CNV Normal	CNV Normal	46,XX
Y21206	27	AFU	FGR	28w+2	CNV Normal	CNV Normal	46,XX
Y21207	37	AMA, HARO	AMA,History of adverse reproductive	18w+4	CNV Normal	CNV Normal	46,XX
Y21208	42	AMA, AFU, HARO	AMA, Nasal bone dysplasia, History of adverse reproductive	18w+5	CNV Normal	CNV Normal	46,XX
Y21209	37	AMA, HARO	AMA, History of adverse reproductive	18w+3	CNV Normal	CNV Normal	46,XY
Y21210	35	AMA	AMA	18w+3	seq[hg19]del(X)(p22.33p22.32) chrX:g.2700000_5460000del	seq[GRCh38]del(X)(p22.33p22.32) NC_000023.11:g.2781959_5541959del	46,XX
Y21211	26	MSSHR	Positive Down syndrome screen:T-21:1/73	18w+5	CNV Normal	CNV Normal	46,XX
Y21214	42	AMA	AMA	19w+1	CNV Normal	CNV Normal	46,XY,t(2;18)(q13;q21.3)
Y21215	29	AFU	NT:3.0mm	18w+1	CNV Normal	CNV Normal	46,XY
Y21217	28	AFU	NT:3.9mm	18w+1	CNV Normal	CNV Normal	46,XY
Y21218	24	AFU	NT:3.3mm, Right choroid plexus cyst	18w	CNV Normal	CNV Normal	46,XY
Y21219	29	MSSHR	Positive Down syndrome screen:T-21:1/265	18w+6	CNV Normal	CNV Normal	46,XY
Y21220	26	AFU	Fetal lateral ventricle enlargement	26w+3	CNV Normal	CNV Normal	46, XX, 13cenh-
Y21222	30	MSSHR	Positive Down syndrome screen:T-21:1/174	25w+6	CNV Normal	CNV Normal	46,XX
Y21223	30	AFU	Fetal congenital heart disease	24w+2	CNV Normal	CNV Normal	46, XY, 9qh+
Y21224	33	HARO	First child with epilepsy	19w+1	CNV Normal	CNV Normal	46,XY
Y21225	34	NIPT	High-risk NIPT results for 5 chromosome	20w	CNV Normal	CNV Normal	46,XY
Y21226	40	AMA	AMA	18w+4	CNV Normal	CNV Normal	46,XY
Y21227	36	AMA, HARO	AMA, History of adverse reproductive（abortion 3 times）	17w+6	CNV Normal	CNV Normal	46,XY
Y21228	33	AFU, HARO	NT:3.3mm, History of adverse reproductive（abortion 4 times）	18w+4	seq[hg19]del(1)(q21.1) chr1:g.145380000_145760000del VUS	seq[GRCh38]del(1)(q21.1) NC_000001.11:g.145675059_146055003del VUS	46,XX
Y21229	28	AFU	NT:3.2mm	18w+5	CNV Normal	CNV Normal	46,XY
Y21230	37	AMA, AFU	AMA, Nasal bone dysplasia	19w+1	CNV Normal	CNV Normal	46,XX
Y21231	24	mix, HARO	Pregnant women have intellectual disability, History of adverse reproductive	19w	CNV Normal	CNV Normal	46,XX
Y21233	25	AFU	FGR, oligohydramnios, single umbilical artery	23w+5	CNV Normal	CNV Normal	46,XX
Y21235	26	MSSHR, AFU	Positive Down syndrome screen:T-21：1/215, Ultrasound showed that the fetus had transient varus of one foot	23w+4	CNV Normal	CNV Normal	46,XY
Y21236	26	AFU	Nasal bone dysplasia	18w	CNV Normal	CNV Normal	46,XX
Y21238	17	mix	Pregnancy complicated with epilepsy (long-term medication history)	19w+1	CNV Normal	CNV Normal	46,XX
Y21241	32	MSSHR	Positive Down syndrome screen:T-21:1/91, T-18:1/278	17w+6	CNV Normal	CNV Normal	46,XY
Y21242	32	AFU	NT:3.3mm	20w+2	CNV Normal	CNV Normal	46,XY
Y21243	39	AMA, AFU	AMA , NT:2.6mm	19w+1	CNV Normal	CNV Normal	46,XX
Y21244	27	AFU	Ultrasound showed multiple calcifications in the fetal abdominal cavity	25w	CNV Normal	CNV Normal	46,XX
Y21245	29	AFU	NT:6.2mm	18w	CNV Normal	CNV Normal	46,XX
Y21248	28	MSSHR, HARO	Positive Down syndrome screen:T-21:1/140, Unexplained death of anterior fetus	18w+2	CNV Normal	CNV Normal	46,XY
Y21249	26	NIPT	High-risk NIPT results for other chromosome	18w+3	CNV Normal	CNV Normal	46,XX
Y21251	36	AMA, NIPT	AMA, High-risk NIPT results for other chromosome	19w	CNV Normal	CNV Normal	46,XY
Y21252	24	MSSHR	Positive Down syndrome screen:T-21 1/175	20w+4	CNV Normal	CNV Normal	46,XY
Y21253	28	MSSHR	Positive Down syndrome screen:T-18 1/21	18w+4	CNV Normal	CNV Normal	46,XX
Y21254	24	MSSHR	Positive Down syndrome screen:T-21 1/223	18w+5	CNV Normal	CNV Normal	46,XX
Y21257	26	AFU	NT:3.6mm	22w+2	CNV Normal	CNV Normal	46,XY
Y21259	32	NIPT	High-risk NIPT results for sex chromosome	19w+5	seq[hg19]dup(X)(p22.33q28) chrX:g.1_155270560dup	seq[GRCh38]dup(X)(p22.33q28) NC_000023.11:g.10001_156030895dup	47,XXX
Y21260	31	MSSHR, HARO	Positive Down syndrome screen:T-21 1/192, History of adverse reproductive	19w+4	CNV Normal	CNV Normal	46,XY
Y21261	38	AFU, AMA	NT:2.7mm, AMA	18w+3	CNV Normal	CNV Normal	46,XX
Y21262	31	MSSHR	Positive Down syndrome screen:T-21 1/74	20w+1	CNV Normal	CNV Normal	46,XY
Y21263	28	HARO	The previous fetus was induced due to congenital heart disease	19w+3	CNV Normal	CNV Normal	46,XX
Y21264	34	AFU	Fetal lateral ventricle enlargement	29w+3	CNV Normal	CNV Normal	46,XY
Y21265	27	MSSHR, NIPT	Positive Down syndrome screen:T-21 1/268, High-risk NIPT results for other chromosome	18w+3	seq[hg19]dup(X)(p22.33q28) chrX:g.1_155270560dup	seq[GRCh38]dup(X)(p22.33q28) NC_000023.11:g.10001_156030895dup	47,XXY
Y21266	29	AFU	NT:3.0mm	18w+4	CNV Normal	CNV Normal	46,XX
Y21269	27	mix	The pregnant woman has physical and intellectual disability	19w+1	CNV Normal	CNV Normal	46,XX
Y21270	25	NIPT	High-risk NIPT results for sex chromosome	20w+3	seq[hg19]del(Y)(p11.32q12)(mos) chrY:g.1_59373566del seq[hg19]del(Y)(q11.221q11.23) chrY:g.18540000_28800000del	seq[GRCh38]del(Y)(p11.32q12)(mos) NC_000024.10:g.1_57217415del seq[GRCh38]del(Y)(q11.221q11.23) NC_000024.10:g.16428120_26653853del	mos45,X[22]/46,XY[8]
Y21271	36	AMA, AFU, HARO	AMA, FGR, The previous fetus was induced due to congenital heart disease	19w+1	CNV Normal	CNV Normal	46,XX
Y21273	29	AFU, MSSHR	Nasal bone dysplasia, Positive Down syndrome screen:T-21 1/229	24w+1	seq[hg19]del(20)(p13) chr20:g.60000_1100000del	seq[GRCh38]del(20)(p13) NC_000020.11:g.79360_1119357del	46,XX
Y21275	23	NIPT	High-risk NIPT results for other chromosome	19w+5	seq[hg19]del(15)(q13.2q13.3) chr15:g.31060000_32440000del	seq[GRCh38]del(15)(q13.2q13.3) NC_000015.10:g.30767797_32147799del	46,XX
Y21276	18	AFU	NT:3.7mm	19w+3	CNV Normal	CNV Normal	46,XX
Y21277	32	AFU	Positive for ultrasonographic soft markers	27w	CNV Normal	CNV Normal	46,XX
Y21278	27	MSSHR	Positive Down syndrome screen:T-21 1/42	17w+6	CNV Normal	CNV Normal	46,XY
Y21279	39	AMA	AMA	18w+5	CNV Normal	CNV Normal	46,X,inv(Y)(p11.3;q12)
Y21282	28	NIPT	High-risk NIPT results for sex chromosome	20w+1	CNV Normal	CNV Normal	46,XY
Y21283	20	AFU, MSSHR	NT:2.8mm, Positive Down syndrome screen:T-21 1/242	19w+1	seq[hg19]del(16)(p13.11p12.3) chr16:g.15520000_18180000del	seq[GRCh38]del(16)(p13.11p12.3) NC_000016.10:g.15426143_18086143del	46,XY
Y21285	37	AFU, AMA	B-ultrasound showed abnormal development of fetal right kidney and cystic mass in abdominal cavity, AMA	22w+6	CNV Normal	CNV Normal	46,XX
Y21286	38	AMA, HARO	AMA, History of adverse reproductive	18w+3	CNV Normal	CNV Normal	46,XX
Y21287	28	AFU	NT:2.7mm	19w+3	CNV Normal	CNV Normal	46,XX
Y21288	29	HARO	History of adverse reproductive	18w+1	CNV Normal	CNV Normal	46,XY
Y21292	25	AFU	NT:4.8mm	23w+5	CNV Normal	CNV Normal	46,XY
Y21293	28	HARO	History of adverse reproductive	19w+1	CNV Normal	CNV Normal	46,XY
Y21294	29	HARO	History of adverse reproductive	20w+2	CNV Normal	CNV Normal	46,XY
Y21296	38	AMA	AMA	19w+2	CNV Normal	CNV Normal	46,XY
Y21297	43	AMA	AMA	21w+4	CNV Normal	CNV Normal	46,XX,?add(15)
Y21298	28	AFU	NT:2.9mm	19w+3	CNV Normal	CNV Normal	46,XX
Y21299	36	AMA	AMA	18w+4	CNV Normal	CNV Normal	46,XY
Y21302	36	AMA	AMA	18w+3	CNV Normal	CNV Normal	46,XX
Y21303	37	AMA	AMA	21w+4	CNV Normal	CNV Normal	46,XY
Y21304	29	AFU	NF:6.0mm	27w+5	CNV Normal	CNV Normal	46,XY
Y21305	26	MSSHR	Positive Down syndrome screen:T-18 1/60	21w+1	seq[hg19]dup(18)(p11.32q23) chr18:g.1_78077248dup	seq[GRCh38]dup(18)(p11.32q23) NC_000018.10:g.10001_80259271dup	47,XX,+18
Y21306	41	AMA, HARO	AMA, History of adverse reproductive	23w+6	CNV Normal	CNV Normal	46,XX
Y21307	26	AFU	Multiple cyst of fetal right kidney	25w+6	CNV Normal	CNV Normal	46,XY
Y21309	37	AMA, mix	AMA, Gestational diabetes	24w+3	CNV Normal	CNV Normal	46,XY
Y21311	35	AMA, HARO	AMA,History of adverse reproductive	15w+5	CNV Normal	CNV Normal	46,XX
Y21312	25	AFU	Fetal lateral ventricle enlargement	31w+4	seq[hg19]dup(7)(q36.1q36.2) chr7:g.152420000_153420000dup	seq[GRCh38]dup(7)(q36.1q36.2) NC_000007.14:g.152722915_153722915dup	46,XY
Y21313	38	AMA	AMA	22w+6	CNV Normal	CNV Normal	46,XY
Y21314	24	mix	Pregnant women have poor Pregnant women with intellectual disability	19w+3	CNV Normal	CNV Normal	46,XX
Y21315	39	AMA	AMA	21w+6	CNV Normal	CNV Normal	46,XY
Y21316	45	AMA	AMA	26w+3	CNV Normal	CNV Normal	46,XY
Y21317	37	AMA	AMA	18w+1	CNV Normal	CNV Normal	46,XX
Y21320	40	AMA	AMA	19w+1	CNV Normal	CNV Normal	46,XY
Y21322	28	NIPT	High-risk NIPT results for 18 chromosome	19w+1	CNV Normal	CNV Normal	46,XY
Y21323	30	mix	Balanced translocation carrier	20w+3	CNV Normal	CNV Normal	46,XX
Y21325	35	AMA	AMA	21w+1	CNV Normal	CNV Normal	46,XX
Y21326	28	mix	Twins (one survived and one stopped developing)	20w+5	seq[hg19]dup(X)(p22.31) chrX:g.6440000_8140000dup VUS	seq[GRCh38]dup(X)(p22.31) NC_000023.11:g.6521959_8171959dup VUS	46,XY
Y21327	26	mix	Suspected teratogen contact before pregnancy and early pregnancy	19w+2	CNV Normal	CNV Normal	46,XX
Y21328	24	AFU	absent of left kidney	22w+3	CNV Normal	CNV Normal	46,XY
Y21330	26	NIPT, AFU	High-risk NIPT results for 8 chromosome , Fetal lateral ventricle enlargement	23w+3	CNV Normal	CNV Normal	46,XY
Y21331	39	AMA	AMA	21w+3	CNV Normal	CNV Normal	46,XY
Y21333	32	AFU	NT:3.0mm	18w+6	CNV Normal	CNV Normal	46,XY
Y21335	27	AFU	Polyhydramnios	29w+3	CNV Normal	CNV Normal	46,XY
Y21336	40	AMA	AMA	19w+1	CNV Normal	CNV Normal	46,XX
Y21337	28	mix	balanced translocation carrier	19w	CNV Normal	CNV Normal	46,XY
Y21340	27	mix	COL4A5 gene mutation carrier	18w+1	CNV Normal	CNV Normal	46,XX
Y21341	32	AFU	NT：2.44mm	19w+2	CNV Normal	CNV Normal	46,XY
Y21342	33	MSSHR	Positive Down syndrome screen:T-21:1/43	20w	CNV Normal	CNV Normal	46,XY
Y21347	32	mix	balanced translocation carrier	19w+5	CNV Normal	CNV Normal	46,XY
Y21348	27	mix	NIPT detection failed	20w+5	CNV Normal	CNV Normal	46,XY
Y21349	44	AMA	AMA	18w+4	CNV Normal	CNV Normal	46,XY
Y21352	29	AFU, MSSHR	Nasal bone dysplasia, Positive Down syndrome screen:T-21 1/229	24w	seq[hg19]dup(16)(p13.11) chr16:g.15040000_16300000dup	seq[GRCh38]dup(16)(p13.11) NC_000016.10:g.14946143_16206143dup	46,XY
Y21353	28	NIPT	High-risk NIPT results for other chromosome	19w+5	CNV Normal	CNV Normal	46,XY
Y21354	29	mix	Pregnant women with intellectual disability	27w	CNV Normal	CNV Normal	46,XY
Y21356	35	AMA, HARO	AMA, History of adverse reproductive	20w	CNV Normal	CNV Normal	46,XX
Y21357	23	AFU	Ventricular septal defect, aortic stenosis	25w	CNV Normal	CNV Normal	46,XX
Y21358	28	AFU	Hydronephrosis on one side of fetus (11mm)	22w+1	CNV Normal	CNV Normal	46,XX
Y21359	39	AMA, HARO	AMA, First-born corpus callosum dysplasia.	19w+3	CNV Normal	CNV Normal	46,XX
Y21363	38	AMA, AFU	AMA, FGR	23w+4	CNV Normal	CNV Normal	46,XX
Y21364	30	NIPT	High-risk NIPT results for sex chromosome	18w+6	CNV Normal	CNV Normal	46,XX
Y21365	43	AMA	AMA	21w+3	CNV Normal	CNV Normal	46,XX
Y21366	34	MSSHR, AFU	Positive Down syndrome screen:T-21 1/193, Fetal lateral ventricle enlargement	19w+4	CNV Normal	CNV Normal	46,XX
Y21367	28	AFU	NT:3.1mm	25w+4	seq[hg19]dup(21)(q11.2q22.3) chr21:g.14300000_48129895dup	seq[GRCh38]dup(21)(q11.2q22.3) NC_000021.9:g.12965809_46699983dup	47,XY,+21
Y21368	33	AFU	FGR	24w+6	CNV Normal	CNV Normal	46,XX
Y21369	45	AMA	AMA	18w+4	CNV Normal	CNV Normal	46,XY
Y21370	35	AMA, HARO	AMA, The embryo stopped developing twice, and CNV-seq detection of chorionic villi showed that chromosome 15 was abnormal	19w	CNV Normal	CNV Normal	46,XX
Y21371	32	MSSHR	Positive Down syndrome screen:T-21 1/24	19w+4	CNV Normal	CNV Normal	46,XY
Y21372	35	AMA	AMA	18w+5	CNV Normal	CNV Normal	46,XY
Y21374	26	NIPT	High-risk NIPT results for sex chromosome	19w+6	seq[hg19]del(X)(p22.31) chrX:g.6460000_8140000del	seq[GRCh38]del(X)(p22.31) NC_000023.11:g.6541959_8171959del	46,XY
Y21375	26	AFU	FGR	30w+2	CNV Normal	CNV Normal	46,XX
Y21377	25	MSSHR, AFU	Positive Down syndrome screen:T-21 1/184, NT:3.0mm	18w	CNV Normal	CNV Normal	46,XY
Y21379	30	AFU	NT：3.2mm	18w+5	CNV Normal	CNV Normal	46,XX
Y21380	30	AFU	Fetal lateral ventricle enlargement	24w+4	CNV Normal	CNV Normal	46,XY
Y21382	30	mix	Chromosome Roche translocation of the pregnant women who after PGD	18w+4	CNV Normal	CNV Normal	45,XY,rob(14;21)(q10;q10)
Y21385	26	NIPT	High-risk NIPT results for 18 chromosome	19w+1	CNV Normal	CNV Normal	46,XY
Y21386	35	AMA, mix	AMA, DMD gene mutation carriers	19w	CNV Normal	CNV Normal	46,XY
Y21387	27	AFU	Fetal ectopic kidney with ectopic renal surface lesions	24w+1	CNV Normal	CNV Normal	46,XX
Y21389	33	NIPT	High-risk NIPT results for sex chromosome	19w+3	CNV Normal	CNV Normal	46,XX
Y21392	42	AMA	AMA	18w+6	CNV Normal	CNV Normal	46,XY
Y21394	31	AFU	NT:4.9mm	18w+2	CNV Normal	CNV Normal	46,XY
Y21396	20	AFU	FGR, Widening of cerebellar medullary cistern	27w+3	seq[hg19]dup(1)(p36.33p36.32) chr1:g.1700000_4860000dup	seq[GRCh38]dup(1)(p36.33p36.32) NC_000001.11:g.1768561_4799940dup VUS	46,XY
Y21399	28	MSSHR	Positive Down syndrome screen:T-21 1/161	19w+5	CNV Normal	CNV Normal	46,XY
Y21400	27	MSSHR	Positive Down syndrome screen:T-21 1/147	18w+4	CNV Normal	CNV Normal	46,XX
Y21403	29	mix	Chemotherapy after radical mastectomy	19w+2	CNV Normal	CNV Normal	46,XY
Y21404	35	AMA, HARO	AMA, Chromosomal microdeletion syndrome of previous fetus	19w+6	CNV Normal	CNV Normal	46,XY
Y21406	40	AMA, NIPT	AMA, High-risk NIPT results for sex chromosome	19w+4	CNV Normal	CNV Normal	46,XX
Y21407	41	AMA, NIPT	AMA, High-risk NIPT results for sex chromosome	19w+4	CNV Normal	CNV Normal	46,XX
Y21409	28	AFU, HARO	Nasal bone dysplasia, Chromosome abnormality of previous pregnancy	24w+4	CNV Normal	CNV Normal	46,XX
Y21410	22	AFU	NT:2.9mm	19w	CNV Normal	CNV Normal	46,XY
Y21411	27	AFU	NT:3.0mm	18w+2	CNV Normal	CNV Normal	46,XX
Y21412	34	AFU	NT:3.2mm, NF:6.4mm	19w	CNV Normal	CNV Normal	46,XY
Y21414	34	NIPT	High-risk NIPT results for sex chromosome	19w	seq[hg19]del(X)(p22.31) chrX:g.6460000_8140000del	seq[GRCh38]del(X)(p22.31p22.31) NC_000023.11:g.6541959_8171959del	46,XY,inv(9)(p11q13)
Y21416	28	AFU	FGR, The right heart is enlarged and the aorta is thin	20w	CNV Normal	CNV Normal	46,XY
Y21417	27	NIPT	High-risk NIPT results for other chromosome	18w+4	CNV Normal	CNV Normal	46,XY,inv(9)(p11q13)
Y21418	32	AFU	Hydronephrosis of right kidney, Separation of left renal collecting system	24w+2	CNV Normal	CNV Normal	46,XY
Y21419	23	NIPT	High-risk NIPT results for sex chromosome	21w+1	CNV Normal	CNV Normal	46,XY
Y21420	33	AFU	Enhanced echo in intestine	18w+4	CNV Normal	CNV Normal	46,XY
Y21421	25	mix	PGD	19w+4	seq[hg19]del(22)(q11.21q11.21) chr22:g.18880000_20320000del	seq[GRCh38]del(22)(q11.21q11.21) NC_000022.11:g.18892487_20332477del	46,XX,t(12;14)(q23;q32)
Y21423	29	AFU	Left subclavian artery stenosis	26w+3	CNV Normal	CNV Normal	46,XX
Y21424	27	mix	The pregnant women have epilepsy and intellectual disability	19w+1	CNV Normal	CNV Normal	46,XY
Y21425	23	mix	Prenatal diagnosis requirements for couples	18w	seq[hg19]del(2)(q12.1q12.1) chr2:g.103440000_104880000del	seq[GRCh38]del(2)(q12.1q12.1) NC_000002.12:g.102823541_104263542del	46,XX
Y21431	33	HARO	History of adverse reproductive	19w+1	CNV Normal	CNV Normal	46,XY
Y21432	27	HARO	History of adverse reproductive	25w+1	CNV Normal	CNV Normal	46,XY
AMA, advanced maternal age; MSSHR, maternal serum screening high-risk; AFU, abnormal fetal ultrasonography; HARO, history of adverse reproductive outcomes; mix, mixed indicators, NIPT, the high-throughput sequencing non-invasive prenatal testing, NT, nuchal translucency, NF, thickened nuchal fold, CNV, copy number variation, FGR, fetal growth restriction, PGD, preimplantation genetic diagnosis.
